# Supplementary material for: Total synthesis and structural elucidation of spongosoritin A
Source: Royal Society of Chemistry journal article supplement (doi:10.1039/c7ob03150e), 2018-01-01
Supplement: c7ob03150e1.pdf [file c7ob03150e1.pdf]

Supporting Information for “Total synthesis and structural elucidation of spongisoritin A” L J Alcock, M D Norris and M V Perkins

## Supporting Information for “Total synthesis and structural elucidation of spongisoritin A”

Lisa J. Alcock, Matthew D. Norris and Michael V. Perkins\*

College of Science and Engineering, Flinders University, GPO Box 2100, Adelaide, SA 5001, Australia

\*mike.perkins@flinders.edu.au

### Contents

|                                                                                                                                                       |     |
|-------------------------------------------------------------------------------------------------------------------------------------------------------|-----|
| Assignment of syn and anti diastereomers for lactones <b>15a</b> & <b>15b</b> .....                                                                   | S2  |
| Comparison of <sup>13</sup> C and <sup>1</sup> H NMR data for reported natural product compared to synthetic syn- <b>1a</b> and anti- <b>1b</b> ..... | S3  |
| NMR and HRMS data for compounds <b>1a/1b,8a/8b, 11a/11b, 12, 15-18</b> .....                                                                          | S4  |
| <sup>1</sup> H, <sup>13</sup> C NMR and HRMS (ESI) data for compound <b>12</b> .....                                                                  | S4  |
| <sup>1</sup> H, <sup>13</sup> C NMR and HRMS (ESI) data for compound <b>16</b> .....                                                                  | S7  |
| <sup>1</sup> H, <sup>13</sup> C NMR and HRMS (ESI) data for compound <b>15a/15b</b> .....                                                             | S10 |
| <sup>1</sup> H, <sup>13</sup> C NMR and HRMS (ESI) data for compound <b>17a</b> .....                                                                 | S13 |
| <sup>1</sup> H, <sup>13</sup> C NMR and HRMS (ESI) data for compound <b>17b</b> .....                                                                 | S16 |
| <sup>1</sup> H, <sup>13</sup> C NMR and HRMS (ESI) data for compound <b>18a</b> .....                                                                 | S19 |
| <sup>1</sup> H, <sup>13</sup> C NMR and HRMS (ESI) data for compound <b>18b</b> .....                                                                 | S22 |
| <sup>1</sup> H, <sup>13</sup> C NMR and HRMS (ESI) data for compound <b>11a</b> .....                                                                 | S25 |
| <sup>1</sup> H, <sup>13</sup> C NMR and HRMS (ESI) data for compound <b>11b</b> .....                                                                 | S28 |
| <sup>1</sup> H, <sup>13</sup> C NMR and HRMS (ESI) data for compound <b>8a</b> .....                                                                  | S31 |
| <sup>1</sup> H, <sup>13</sup> C NMR and HRMS (ESI) data for compound <b>8b</b> .....                                                                  | S34 |
| <sup>1</sup> H, <sup>13</sup> C, COSY, HSQC NMR and HRMS (ESI) data for compound <b>1a</b> .....                                                      | S37 |
| 2D NMR Data <b>1a</b> .....                                                                                                                           | S39 |
| <sup>1</sup> H, <sup>13</sup> C, COSY, HSQC NMR and HRMS (ESI) data for compound <b>1b</b> .....                                                      | S42 |
| 2D NMR Data <b>1b</b> .....                                                                                                                           | S44 |

Assignment of syn and anti diastereomers for lactones **15a** & **15b**

Tabulated <sup>1</sup>H NMR data for the syn- (**15a**) and anti- (**15b**) lactones. Assignments were based on <sup>1</sup>H NMR comparison with previously reported analogous lactones by Brimble<sup>1</sup> and Perkins<sup>2</sup>.

| Carbon | 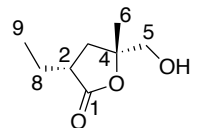<br><b>syn 15a</b><br>(600 MHz, CDCl <sub>3</sub> ) | <br><b>anti 15b</b><br>(600 MHz, CDCl <sub>3</sub> ) | <br>Perkins <i>syn</i> -isomer<br>(500 MHz, CDCl <sub>3</sub> ) | <br>Perkins <i>anti</i> -isomer<br>(500 MHz, CDCl <sub>3</sub> ) | <br>Brimble's <i>syn</i> -lactone<br>(200 MHz, CDCl <sub>3</sub> ) | <br>Brimble's <i>anti</i> -lactone<br>(200 MHz, CDCl <sub>3</sub> ) |
|--------|--------------------------------------------------------------------------------------------------------------------------------------|---------------------------------------------------------------------------------------------------------------------------------------|---------------------------------------------------------------------------------------------------------------------------------------------------|-----------------------------------------------------------------------------------------------------------------------------------------------------|-------------------------------------------------------------------------------------------------------------------------------------------------------|--------------------------------------------------------------------------------------------------------------------------------------------------------|
| 5      | 3.72 (1H, d, <i>J</i> 12.5 Hz)<br>3.47 (1H, d, <i>J</i> 12.1 Hz)                                                                     | 3.66 (1H, d, <i>J</i> 11.7 Hz)<br>3.55 (1H, d, <i>J</i> 11.7 Hz)                                                                      | 3.75 (1H, dd, <i>J</i> 12.2, 4.3 Hz)<br>3.46 (1H, dd, <i>J</i> 12.2, 7.3 Hz)                                                                      | 3.70 (1H, dd, <i>J</i> 11.9, 5.0 Hz)<br>3.58 (1H, dd, <i>J</i> 11.9, 4.6 Hz)                                                                        | 3.75 (1H, dd, <i>J</i> 12.2, 4.8 Hz)<br>3.45 (1H, dd, <i>J</i> 12.2, 7.4 Hz)                                                                          | 3.72 (1H, d, <i>J</i> 12.0 Hz)<br>3.58 (1H, d, <i>J</i> 12.0 Hz)                                                                                       |
| 2      | 2.73 (1H, m)                                                                                                                         | 2.83 (1H, m)                                                                                                                          | 2.67 (1H, tdd, <i>J</i> 10.2, 9.3, 4.7 Hz)                                                                                                        | 2.82 (1H, m)                                                                                                                                        | 2.91-2.69 (1H, m)                                                                                                                                     | 3.04–2.87 (1H, m)                                                                                                                                      |
| 3      | 2.08 (2H, m)                                                                                                                         | 2.49 (1H, dd, AB distorted)<br>1.68 (1H, dd, AB distorted)                                                                            | 2.12 (1H, dd, <i>J</i> 12.9, 10.2 Hz)<br>1.99 (1H, dd, <i>J</i> 12.9, 10.2 Hz)                                                                    | 2.35 (1H, dd, <i>J</i> 13.0, 10.1 Hz)<br>1.72 (1H, dd, <i>J</i> 10.1, 6.0 Hz)                                                                       | 2.19 (1H, dd, <i>J</i> 12.9, 9.9 Hz)<br>1.95 (1H, dd, <i>J</i> 12.9, 9.9 Hz)                                                                          | 2.43 (1H, dd, <i>J</i> 13.0, 10.0 Hz)<br>1.76–1.66 (1H, overlapping)                                                                                   |
| 8      | 1.51 (2H, m)                                                                                                                         | 1.91 (2H, m)                                                                                                                          | 1.91 (1H, dtd, <i>J</i> 13.8, 7.5, 4.6 Hz)<br>1.54 (1H, dtd, <i>J</i> 13.8, 9.3, 7.5 Hz)                                                          |                                                                                                                                                     | 1.29 (3H, d, <i>J</i> 7.0 Hz)                                                                                                                         | 1.26 (3H, d, <i>J</i> 7.3 Hz)                                                                                                                          |
| 6      | 1.35 (3H, s)                                                                                                                         | 1.39 (3H, s)                                                                                                                          | 1.69 (2H, q, <i>J</i> 7.6 Hz)                                                                                                                     |                                                                                                                                                     | 1.69 (2H, q, <i>J</i> 7.5 Hz)                                                                                                                         | 1.76–1.66 (2H, overlapping)                                                                                                                            |
| 9      | 0.98 (3H, t, <i>J</i> 7.3 Hz)                                                                                                        | 0.99 (3H, t, <i>J</i> 7.4 Hz)                                                                                                         | 0.99 (3H, t, <i>J</i> 7.5 Hz)                                                                                                                     |                                                                                                                                                     | N/A                                                                                                                                                   | N/A                                                                                                                                                    |
| 7      | N/A                                                                                                                                  | N/A                                                                                                                                   | 0.95 (3H, t, <i>J</i> 7.5 Hz)                                                                                                                     |                                                                                                                                                     | 0.94 (3H, t, <i>J</i> 7.5 Hz)                                                                                                                         | 0.94 (3H, t, <i>J</i> 7.5 Hz)                                                                                                                          |

All chemical shifts reported in ppm

(1) P. R. Allen, M. A. Brimble and H. Prabakaran, *J. Chem. Soc., Perkin Trans. I*, 2001, 379.

(2) M. D. Norris, M. V. Perkins and E. J. Sorensen, *Org. Lett.*, 2015, **17**, 668.

Comparison of  $^{13}\text{C}$  and  $^1\text{H}$  NMR data for reported natural product compared to synthetic syn-**1a** and anti-**1b**

| Carbon no. | Natural product Capon <sup>3</sup>                      |                                                      | Natural product Epifanio <sup>4</sup>                    |                                                      | Synthetic syn <b>1a</b>                                 |                                                      |                                | Synthetic anti <b>1b</b>                                |                                                      |                                |
|------------|---------------------------------------------------------|------------------------------------------------------|----------------------------------------------------------|------------------------------------------------------|---------------------------------------------------------|------------------------------------------------------|--------------------------------|---------------------------------------------------------|------------------------------------------------------|--------------------------------|
|            | $^{13}\text{C}$<br>(150 MHz,<br>$\text{CDCl}_3$ ) (ppm) | $^1\text{H}$<br>(600 MHz,<br>$\text{CDCl}_3$ ) (ppm) | $^{13}\text{C}$<br>(75.4 MHz,<br>$\text{CDCl}_3$ ) (ppm) | $^1\text{H}$<br>(300 MHz,<br>$\text{CDCl}_3$ ) (ppm) | $^{13}\text{C}$<br>(150 MHz,<br>$\text{CDCl}_3$ ) (ppm) | $^1\text{H}$<br>(600 MHz,<br>$\text{CDCl}_3$ ) (ppm) | $\Delta\delta^{13}\text{C}^\#$ | $^{13}\text{C}$<br>(150 MHz,<br>$\text{CDCl}_3$ ) (ppm) | $^1\text{H}$<br>(600 MHz,<br>$\text{CDCl}_3$ ) (ppm) | $\Delta\delta^{13}\text{C}^\#$ |
| 1          | 166.9                                                   |                                                      | 166.9                                                    |                                                      | 166.9                                                   |                                                      | 0                              | 166.9                                                   |                                                      | 0                              |
| 2          | 83.9                                                    | 4.80                                                 | 83.8                                                     | 4.82                                                 | 83.8                                                    | 4.81                                                 | 0.1                            | 84                                                      | 4.80                                                 | -0.1                           |
| 3          | 171.5                                                   |                                                      | 171.5                                                    |                                                      | 171.5                                                   |                                                      | 0                              | 171.1                                                   |                                                      | 0.4                            |
| 4          | 138.2                                                   |                                                      | 138.1                                                    |                                                      | 138.1                                                   |                                                      | 0.1                            | 138.3                                                   |                                                      | -0.1                           |
| 5          | 141.7                                                   | 6.21                                                 | 141.6                                                    | 6.25                                                 | 141.6                                                   | 6.23                                                 | 0.1                            | 141.4                                                   | 6.36                                                 | 0.3                            |
| 6          | 95.1                                                    |                                                      | 95.0*                                                    |                                                      | 95.1                                                    |                                                      | 0                              | 95.2                                                    |                                                      | -0.1                           |
| 7a         | 45.0                                                    | 1.76                                                 | 44.9                                                     | 1.76                                                 | 45                                                      | 1.76                                                 | 0                              | 44.8                                                    | 1.87                                                 | 0.2                            |
| 7b         |                                                         | 1.96                                                 |                                                          | 1.94                                                 |                                                         | 1.96                                                 |                                |                                                         |                                                      |                                |
| 8          | 40.1                                                    | 1.76                                                 | 40.0                                                     | 1.78                                                 | 40                                                      | 1.76                                                 | 0.1                            | 41.4                                                    | 1.72                                                 | -1.3                           |
| 9          | 133.8                                                   | 5.02                                                 | 133.7                                                    | 5.04                                                 | 133.8                                                   | 5.05                                                 | 0                              | 133.1                                                   | 5.05                                                 | 0.7                            |
| 10         | 132.2                                                   | 5.23                                                 | 132.1                                                    | 5.26                                                 | 132.2                                                   | 5.23                                                 | 0                              | 131.9                                                   | 5.30                                                 | 0.3                            |
| 11         | 25.6                                                    | 1.96                                                 | 25.5                                                     | 1.98                                                 | 25.6                                                    | 1.96                                                 | 0                              | 24.9                                                    | 1.97                                                 | 0.7                            |
| 12         | 13.9                                                    | 0.93                                                 | 13.9                                                     | 0.95                                                 | 13.9                                                    | 0.93                                                 | 0                              | 13.6                                                    | 0.95                                                 | 0.3                            |
| 13         | 18.5                                                    | 2.10                                                 | 18.4                                                     | 2.12                                                 | 18.4                                                    | 2.10                                                 | 0.1                            | 18.5                                                    | 2.11                                                 | 0                              |
| 14         | 11.7                                                    | 1.12                                                 | 11.6                                                     | 1.14                                                 | 11.6                                                    | 1.12                                                 | 0.1                            | 11.8                                                    | 1.14                                                 | -0.1                           |
| 15         | 26.3                                                    | 1.40                                                 | 26.3                                                     | 1.42                                                 | 26.3                                                    | 1.41                                                 | 0                              | 25.5                                                    | 1.41                                                 | 0.8                            |
| 16a        | 29.4                                                    | 1.16                                                 | 29.3                                                     | 1.16                                                 | 29.3                                                    | 1.15                                                 | 0.1                            | 29.4                                                    | 1.19                                                 | 0                              |
| 16b        |                                                         | 1.36                                                 |                                                          | 1.36                                                 |                                                         | 1.40                                                 |                                |                                                         | 1.36                                                 |                                |
| 17         | 11.3                                                    | 0.75                                                 | 11.3                                                     | 0.77                                                 | 11.3                                                    | 0.77                                                 | 0                              | 11.4                                                    | 0.80                                                 | -0.1                           |
| OMe        | 50.5                                                    | 3.70                                                 | 50.5                                                     | 3.64                                                 | 50.5                                                    | 3.69                                                 | 0                              | 50.5                                                    | 3.67                                                 | 0                              |

(3) R. J. Capon, S. Singh, S. Ali and S. Sotheeswaran, *Aust. J. Chem.*, 2005, **58**, 18.

(4) R. d. A. Epifanio, L. S. Pinheiro and N. C. Alves, *J. Braz. Chem. Soc.*, 2005, **16**, 1367.

# difference in  $^{13}\text{C}$  chemical shift from the reported natural product<sup>1</sup> compared to the synthetic products

\*reported as 5.0 ppm in original paper (4), but this is likely a typo which should read 95.0

## NMR and HRMS data for compounds **1a/1b**, **8a/8b**, **11a/11b**, **12**, **15-18**

$^1\text{H}$ ,  $^{13}\text{C}$  NMR and HRMS (ESI) data for compound **12**

$^1\text{H}$  NMR data

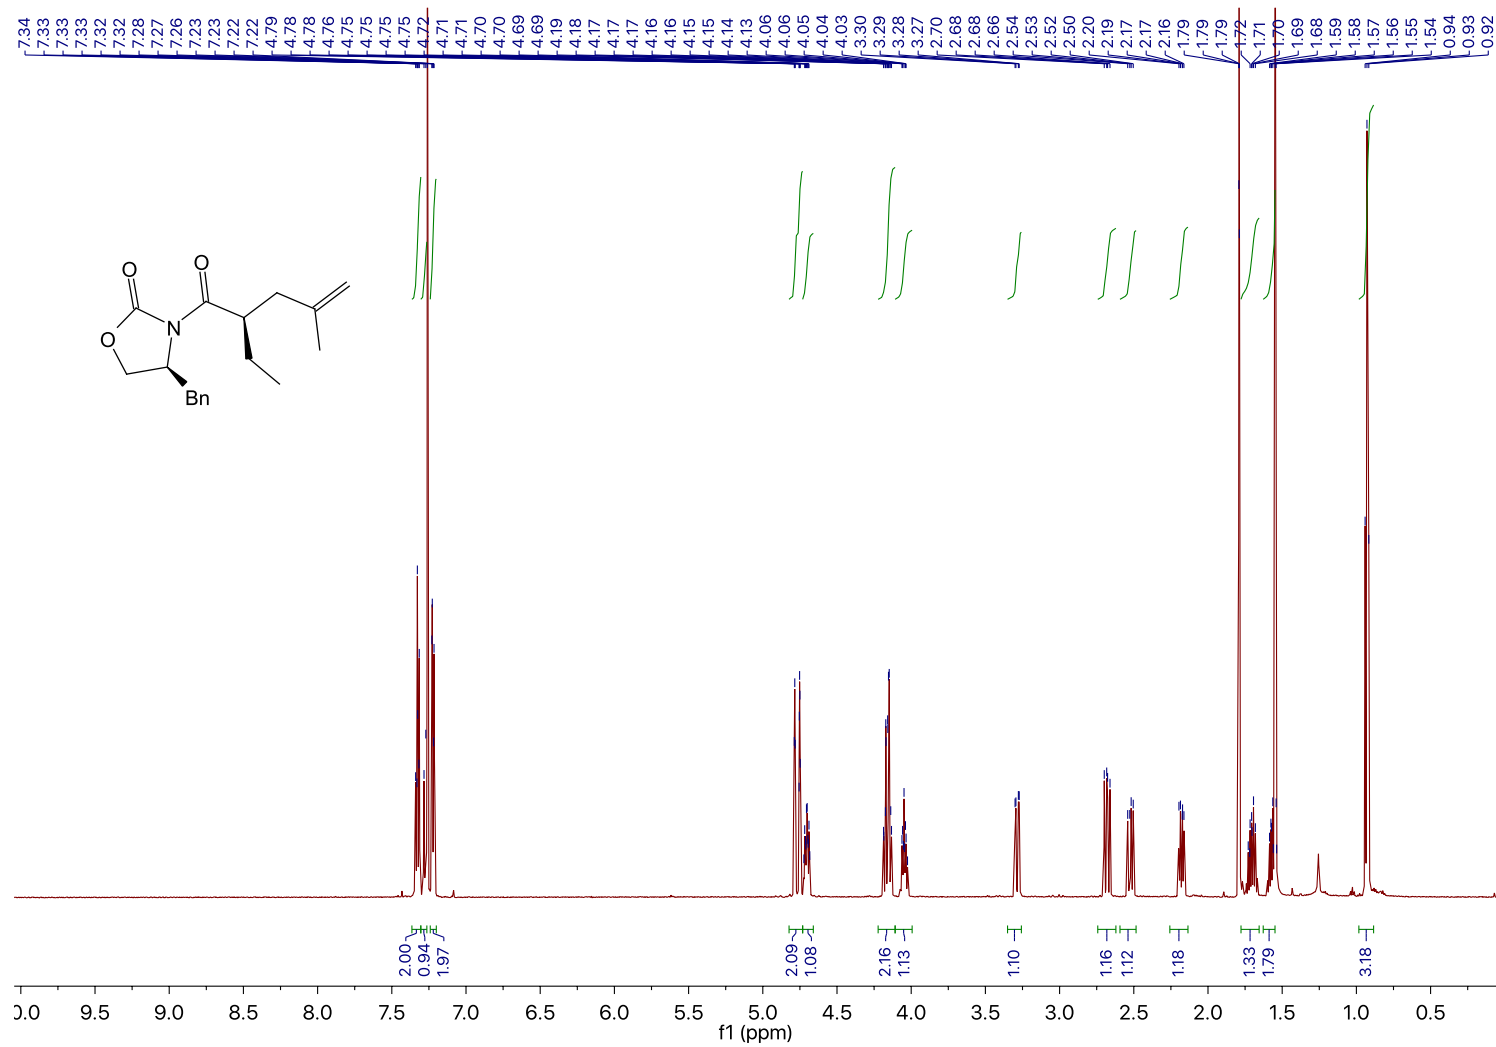

$^{13}\text{C}$  NMR data

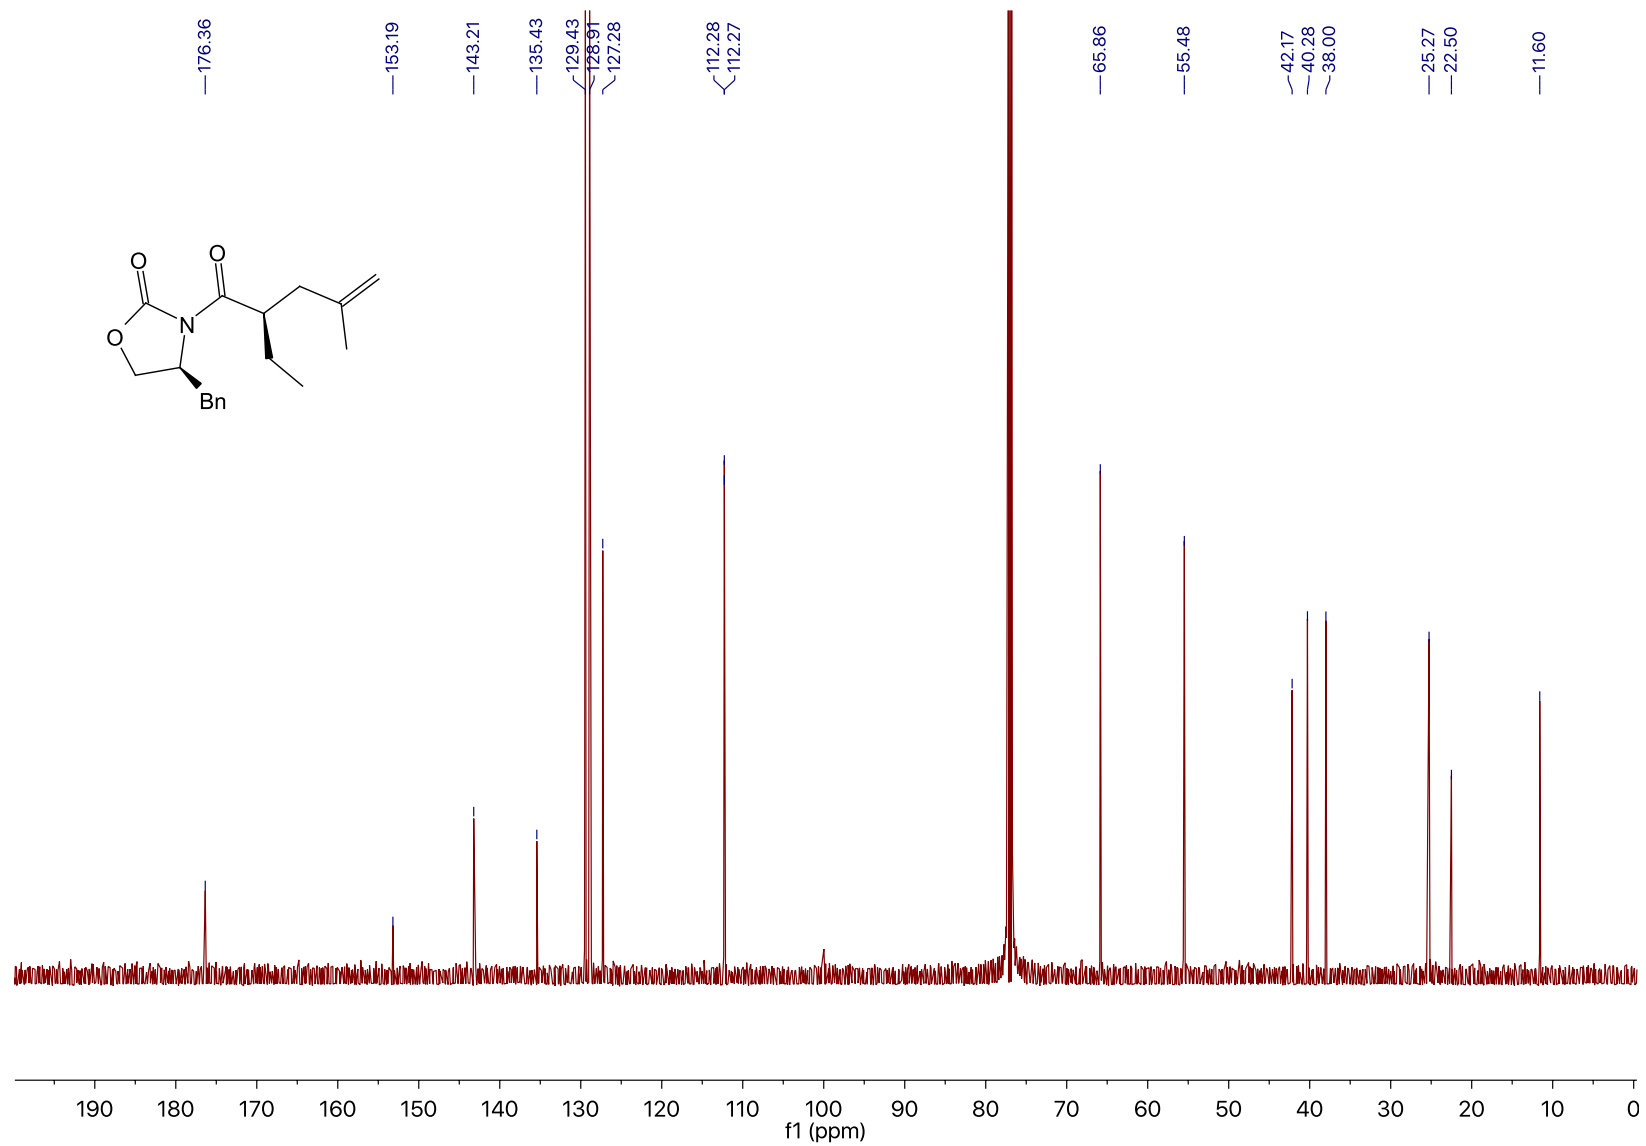

High Resolution Spectra  
Positive ion

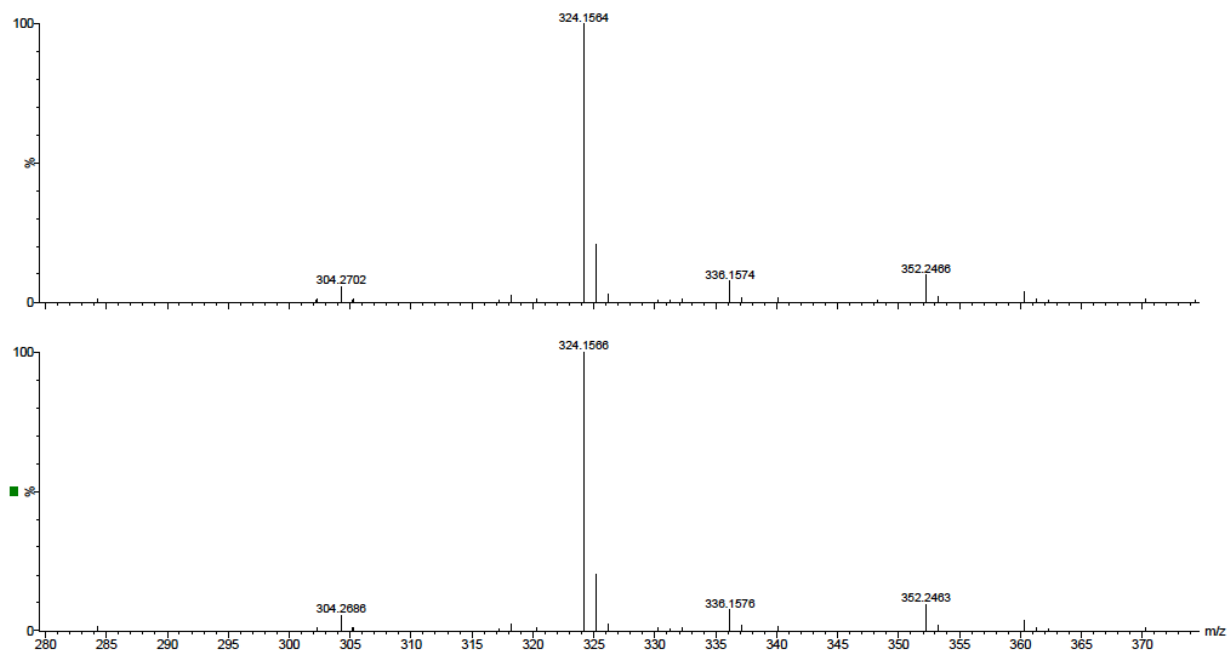

Accurate Mass Data

| Observed Mass | Formula [M+Na] <sup>+</sup>                        | Calculated mass | Difference (ppm) | iFit (norm) |
|---------------|----------------------------------------------------|-----------------|------------------|-------------|
| 324.1566      | C <sub>18</sub> H <sub>23</sub> NO <sub>3</sub> Na | 324.1576        | -3.1             | 1.8         |
| 324.1564      | C <sub>18</sub> H <sub>23</sub> NO <sub>3</sub> Na | 324.1576        | -3.7             | 1.2         |

HRMS data

$^1\text{H}$ ,  $^{13}\text{C}$  NMR and HRMS (ESI) data for compound **16**

$^1\text{H}$  NMR data

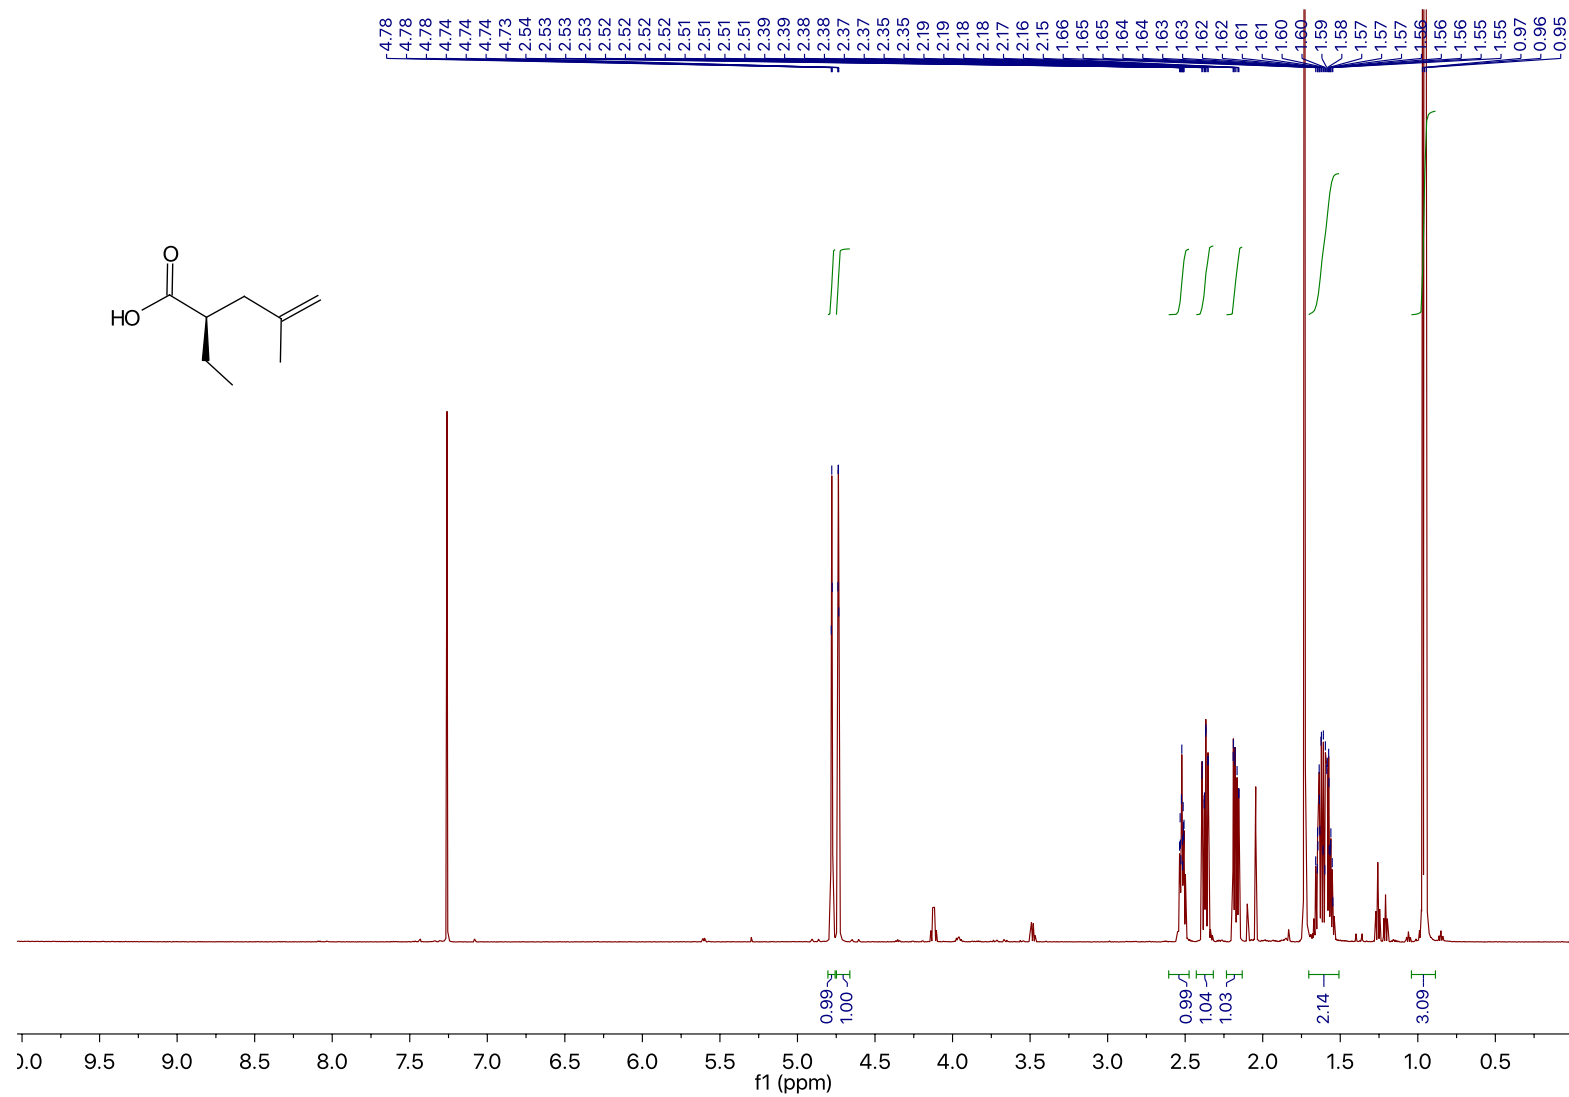

$^{13}\text{C}$  NMR data

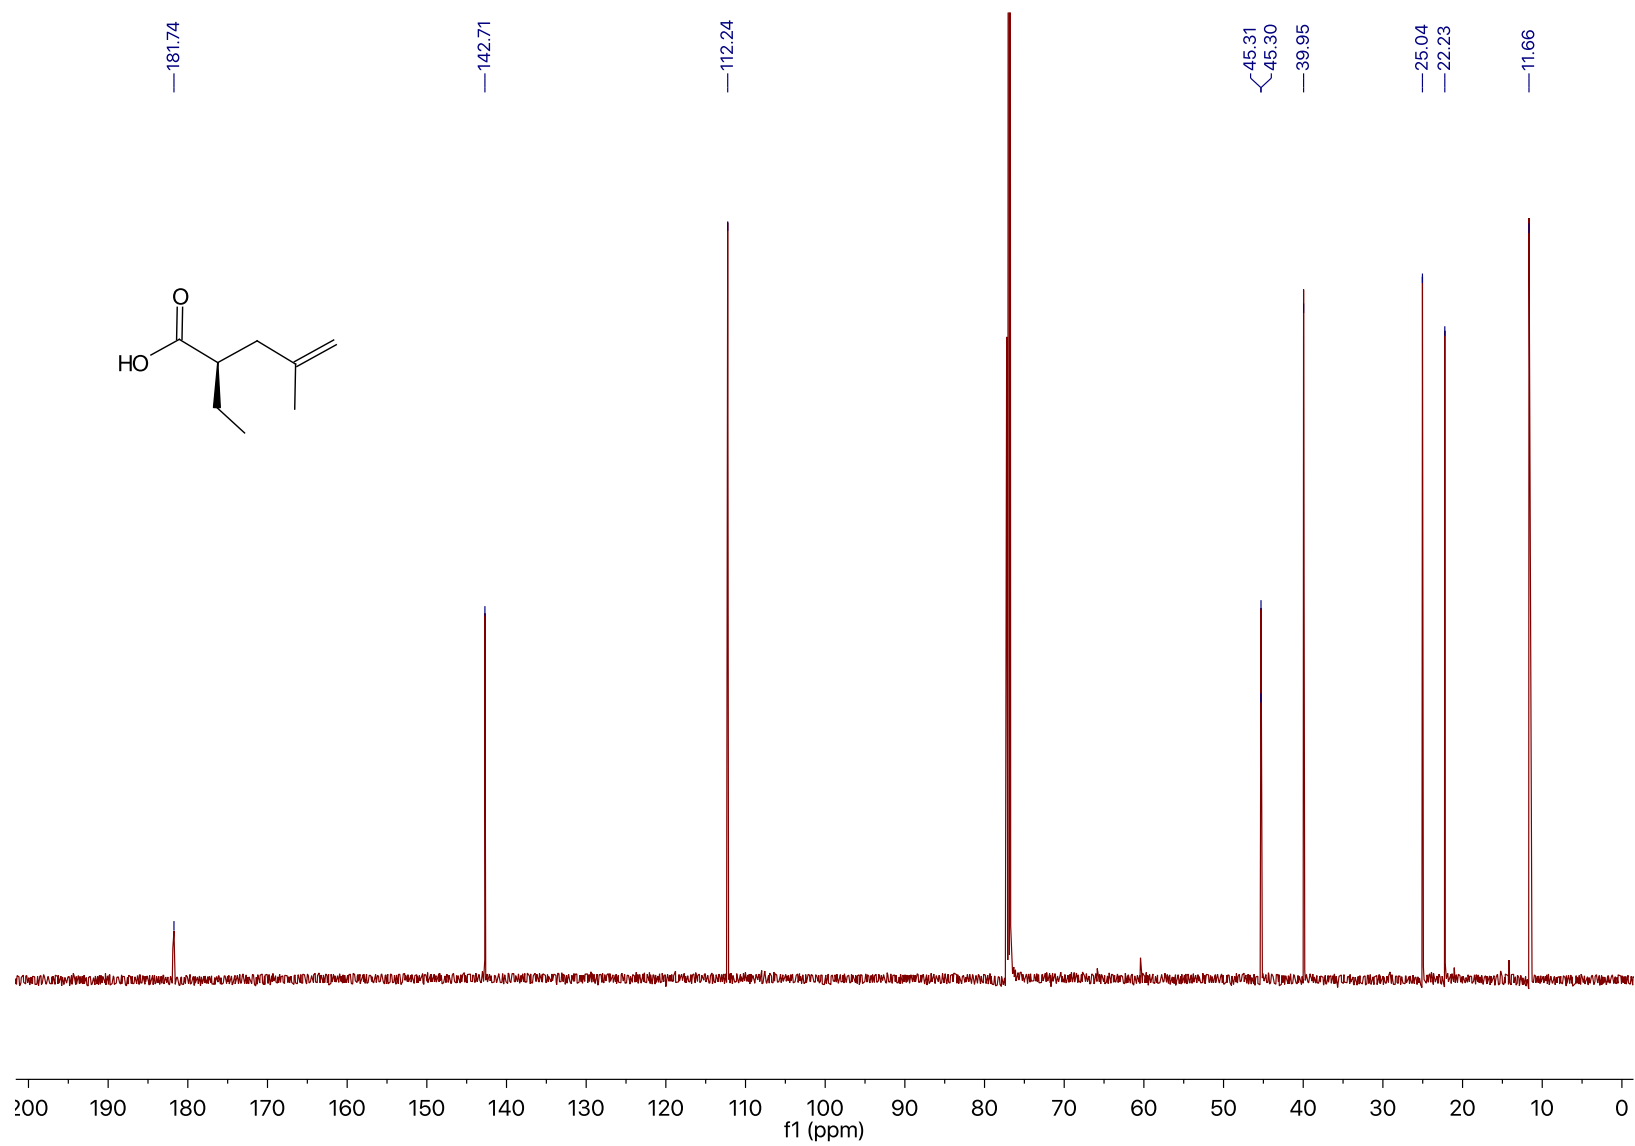



HRMS data

High Resolution Spectra  
Positive ion

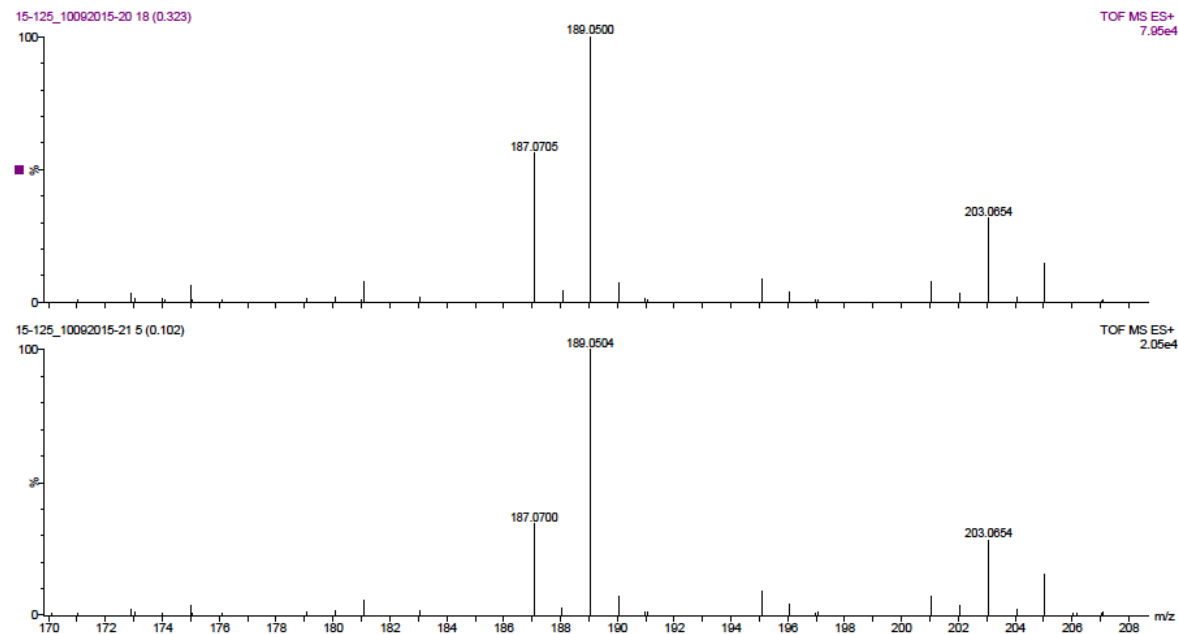

Accurate Mass Data

| Observed Mass | Formula [M+Na] <sup>+</sup>                                   | Calculated mass | Difference (ppm) | iFit (norm) |
|---------------|---------------------------------------------------------------|-----------------|------------------|-------------|
| 187.0700      | C <sub>8</sub> H <sub>13</sub> O <sub>2</sub> Na <sub>2</sub> | 187.0711        | -5.9             | 1.8         |
| 187.0705      | C <sub>8</sub> H <sub>13</sub> O <sub>2</sub> Na <sub>2</sub> | 187.0711        | -3.2             | 1.3         |

$^1\text{H}$ ,  $^{13}\text{C}$  NMR and HRMS (ESI) data for compound **15a/15b**

$^1\text{H}$  NMR data

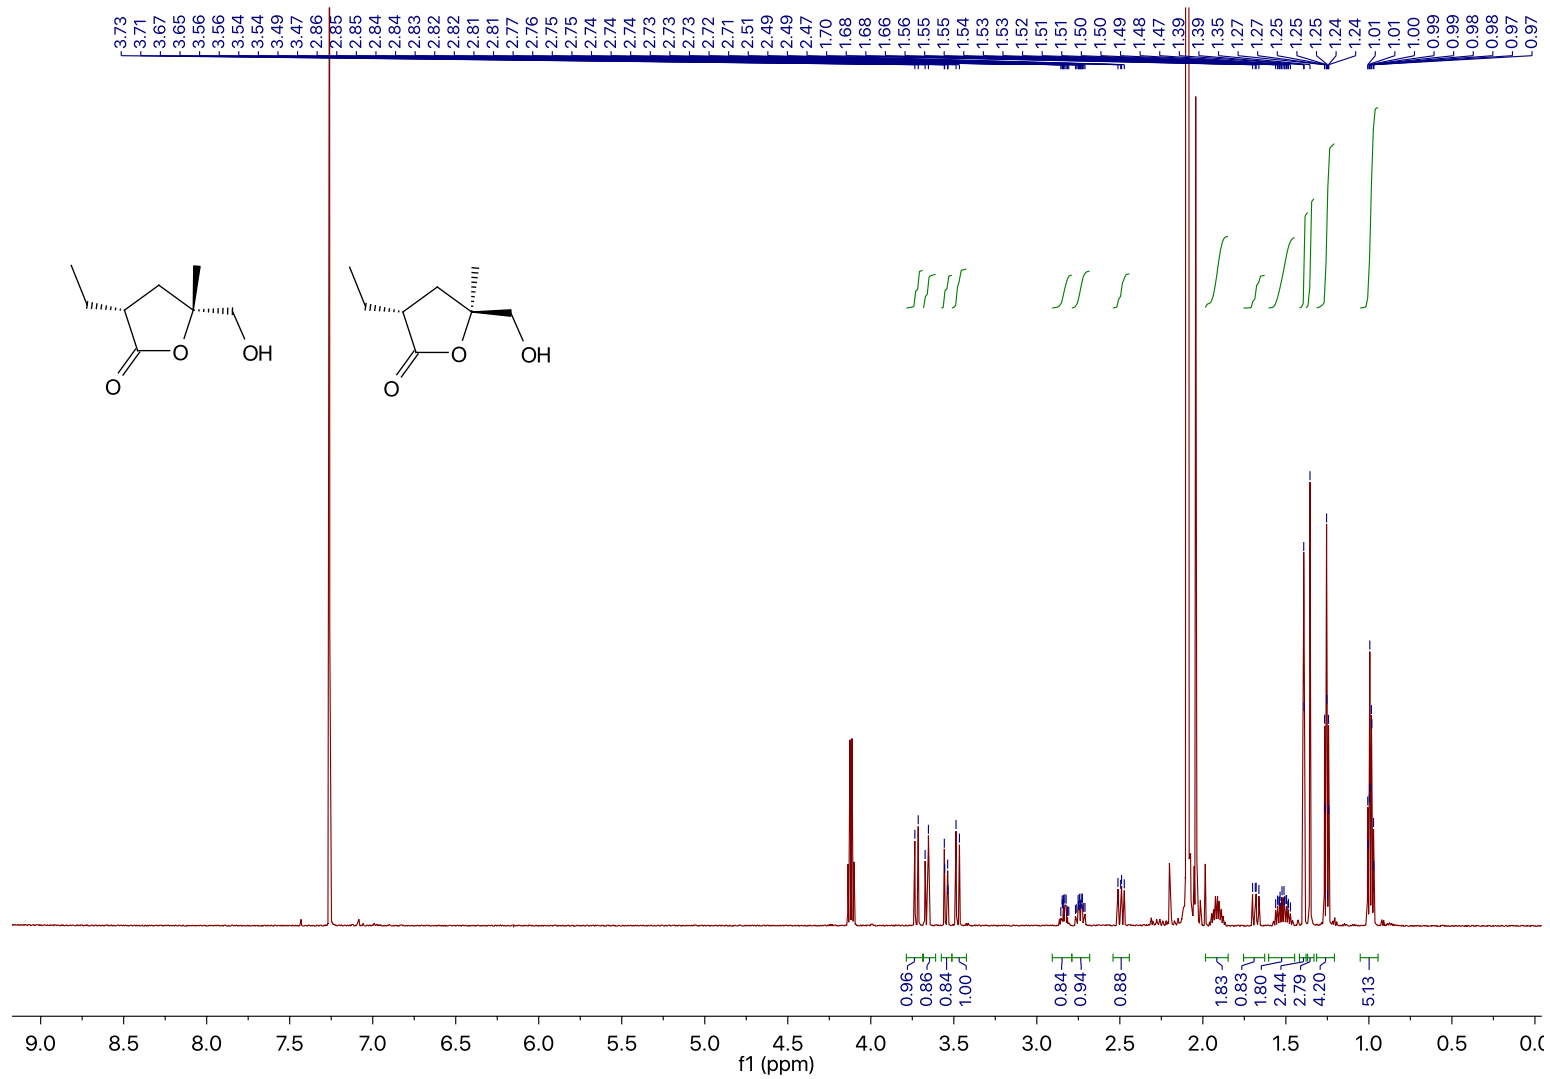

$^{13}\text{C}$  NMR data

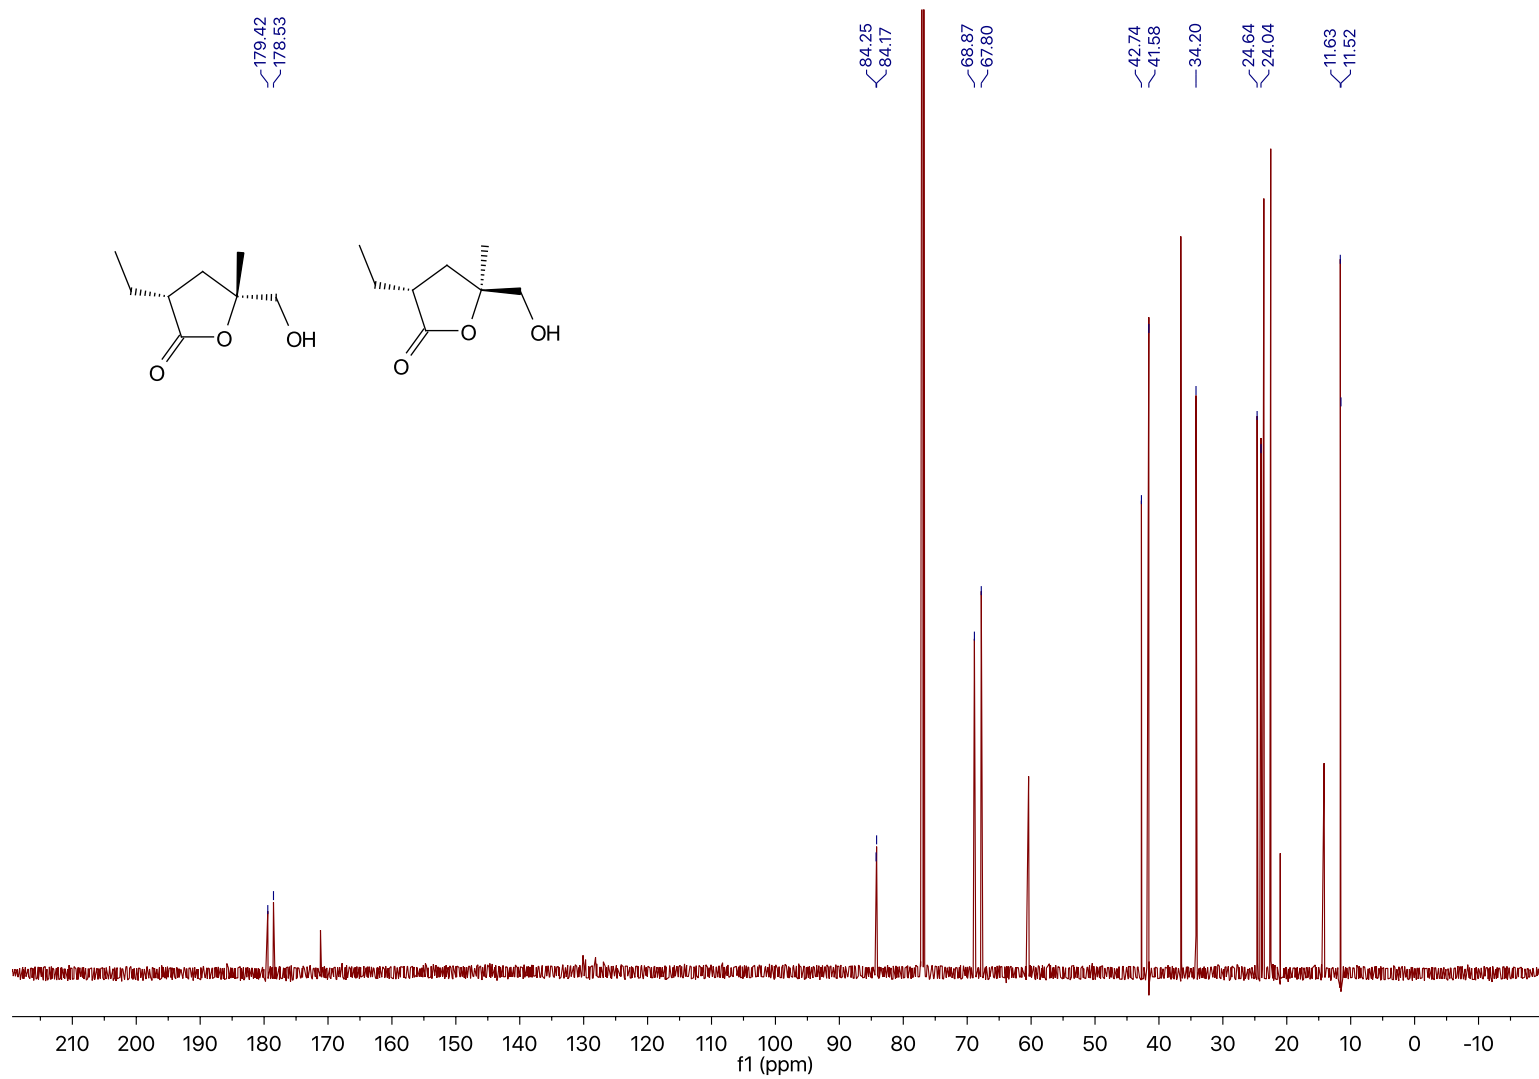

residual solvent peaks (EtOAc) present due to volatility of product

HRMS data

High Resolution Spectra  
Positive ion

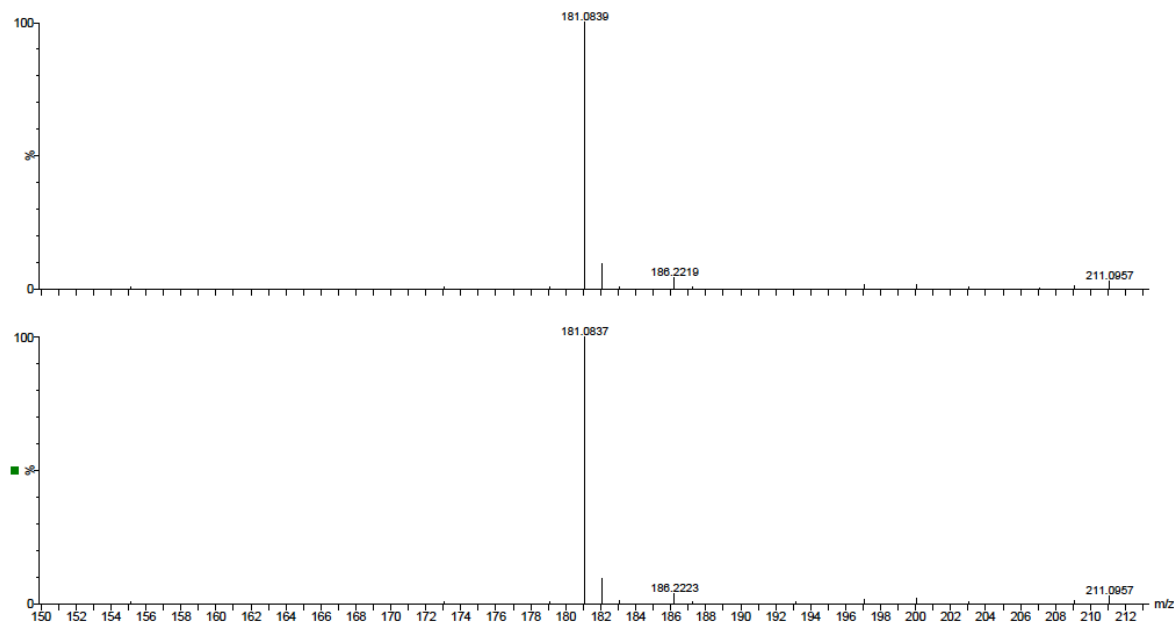

Accurate Mass Data

| Observed Mass | Formula [M+Na] <sup>+</sup>                      | Calculated mass | Difference (ppm) | iFit (norm) |
|---------------|--------------------------------------------------|-----------------|------------------|-------------|
| 181.0837      | C <sub>8</sub> H <sub>14</sub> O <sub>3</sub> Na | 181.0841        | -2.2             | 0.0         |
| 181.0839      | C <sub>8</sub> H <sub>14</sub> O <sub>3</sub> Na | 181.0841        | -1.1             | 0.0         |

$^1\text{H}$ ,  $^{13}\text{C}$  NMR and HRMS (ESI) data for compound **17a**

$^1\text{H}$  NMR data

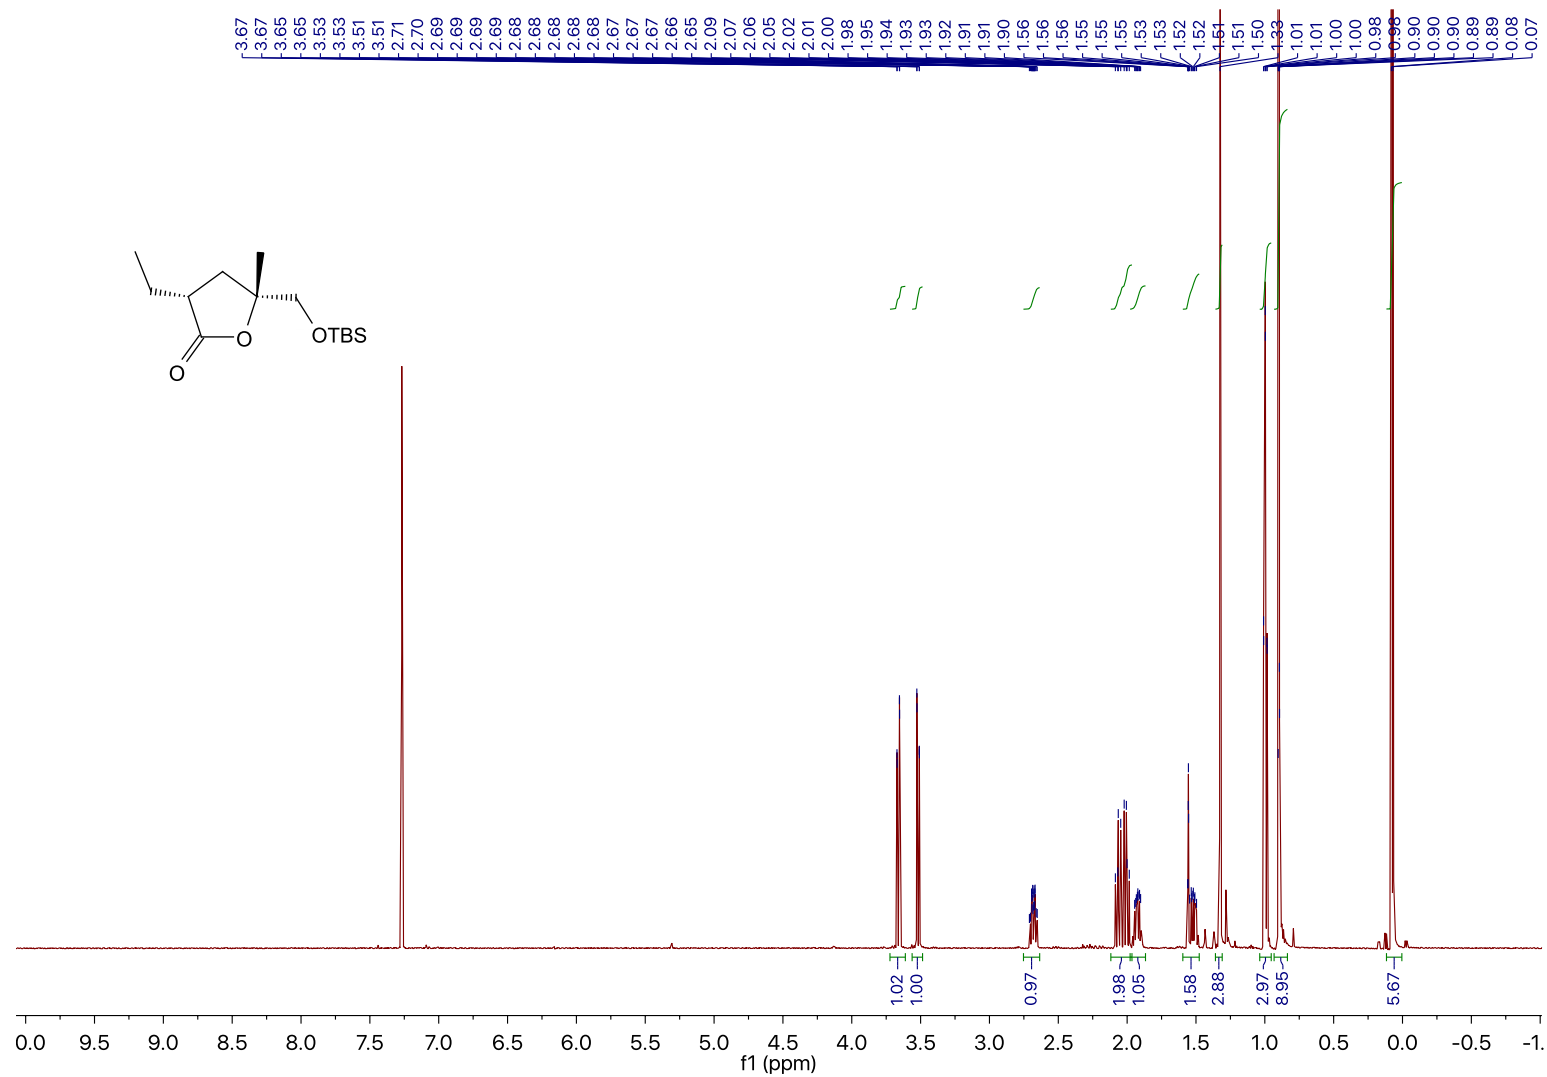

$^{13}\text{C}$  NMR data

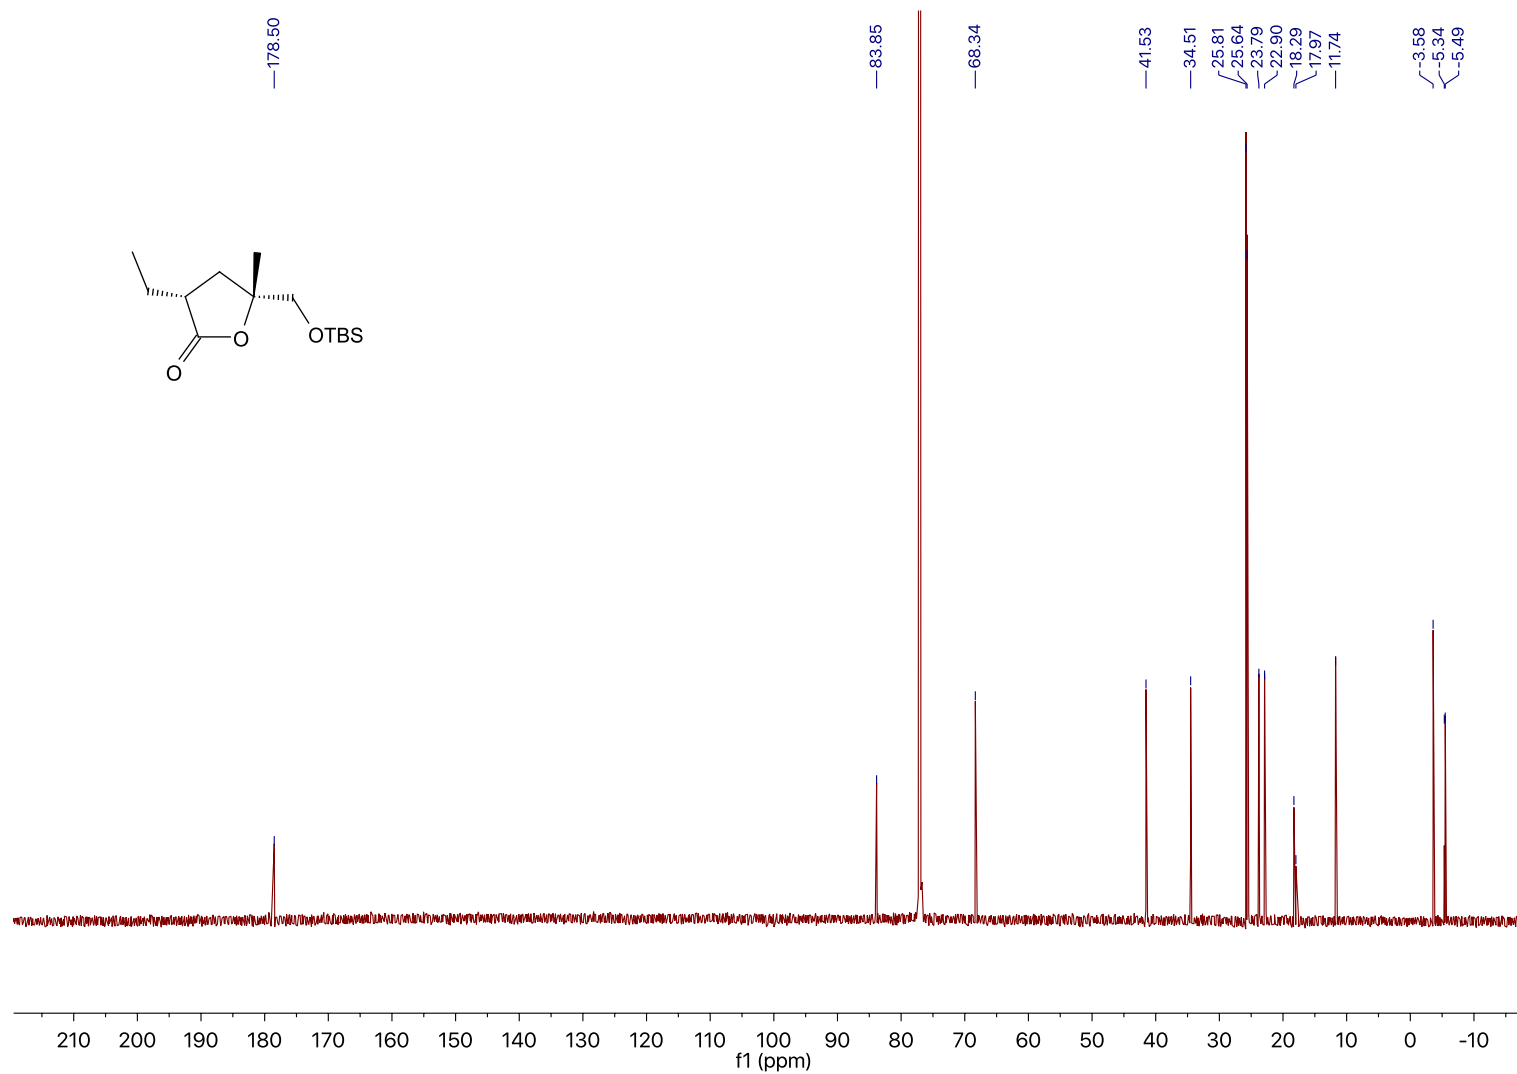

HRMS data

High Resolution Spectra  
Positive ion

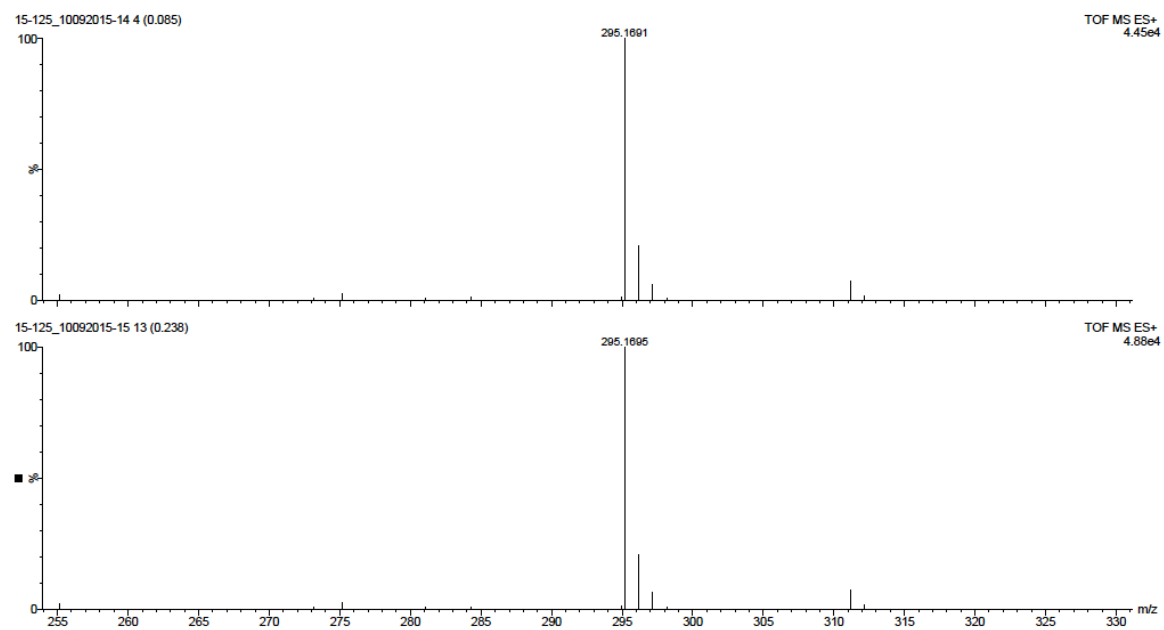

Accurate Mass Data

| Observed Mass | Formula [M+Na] <sup>+</sup>                         | Calculated mass | Difference (ppm) | iFiT (norm) |
|---------------|-----------------------------------------------------|-----------------|------------------|-------------|
| 295.1695      | C <sub>14</sub> H <sub>28</sub> O <sub>3</sub> SiNa | 295.1705        | -3.4             | 0.0         |
| 295.1691      | C <sub>14</sub> H <sub>28</sub> O <sub>3</sub> SiNa | 295.1705        | -4.7             | 0.0         |

$^1\text{H}$ ,  $^{13}\text{C}$  NMR and HRMS (ESI) data for compound **17b**

$^1\text{H}$  NMR data

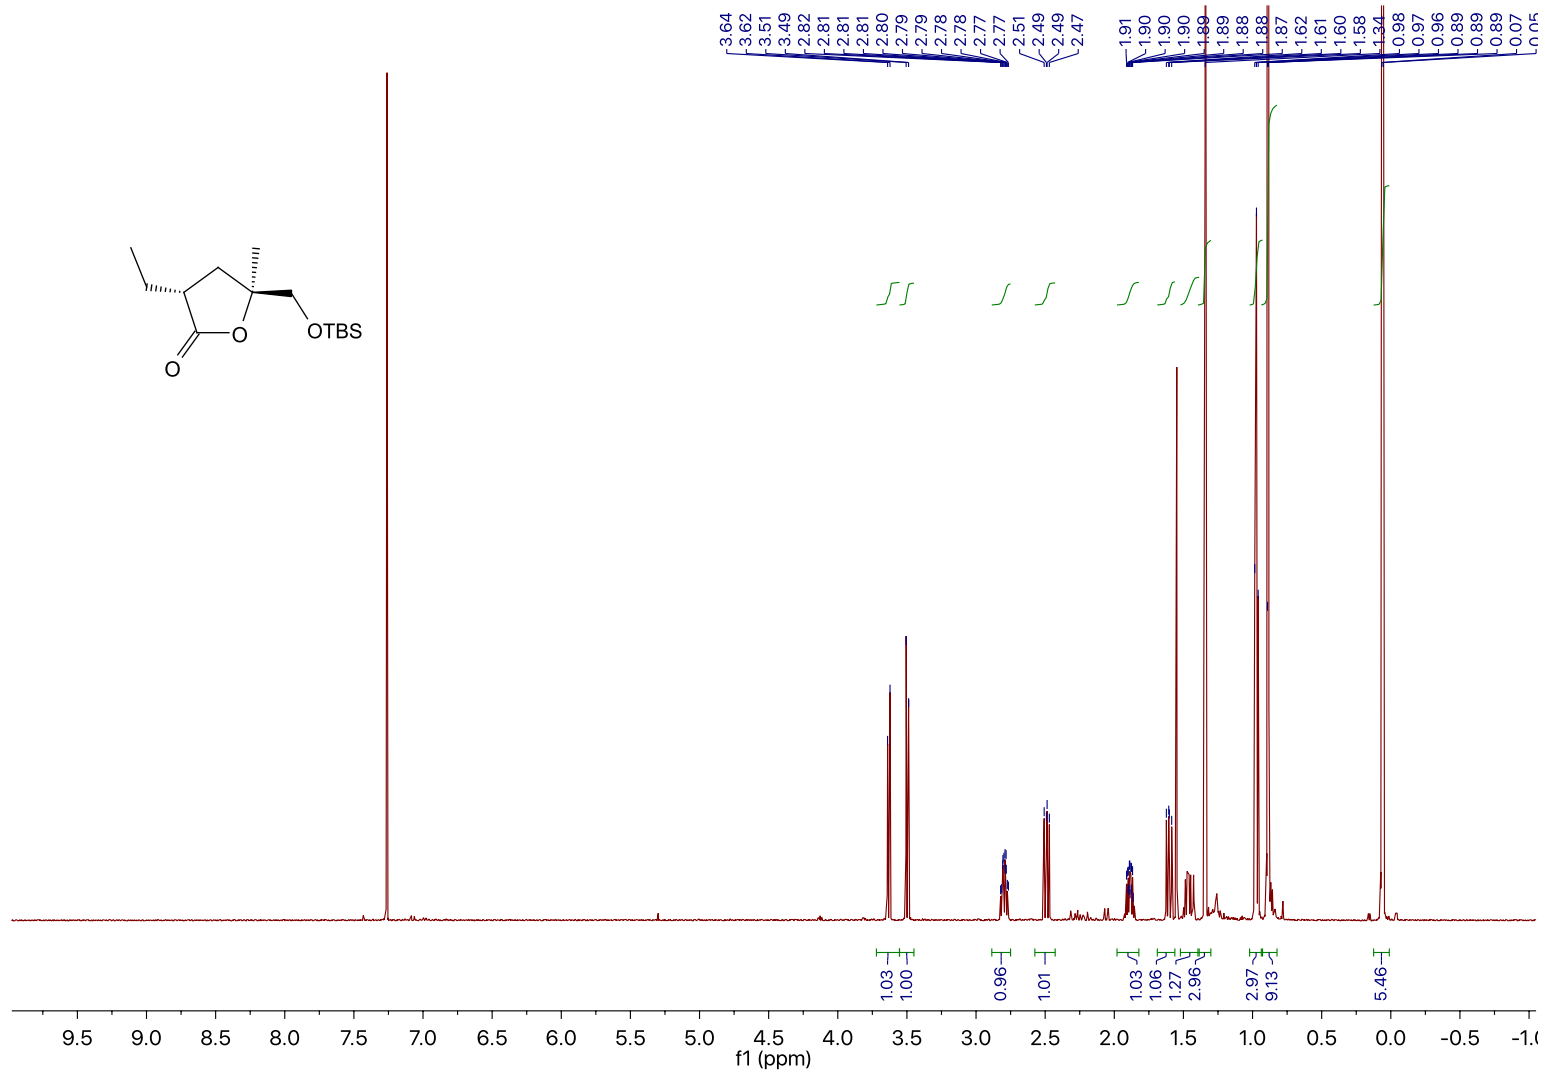



$^{13}\text{C}$  NMR data

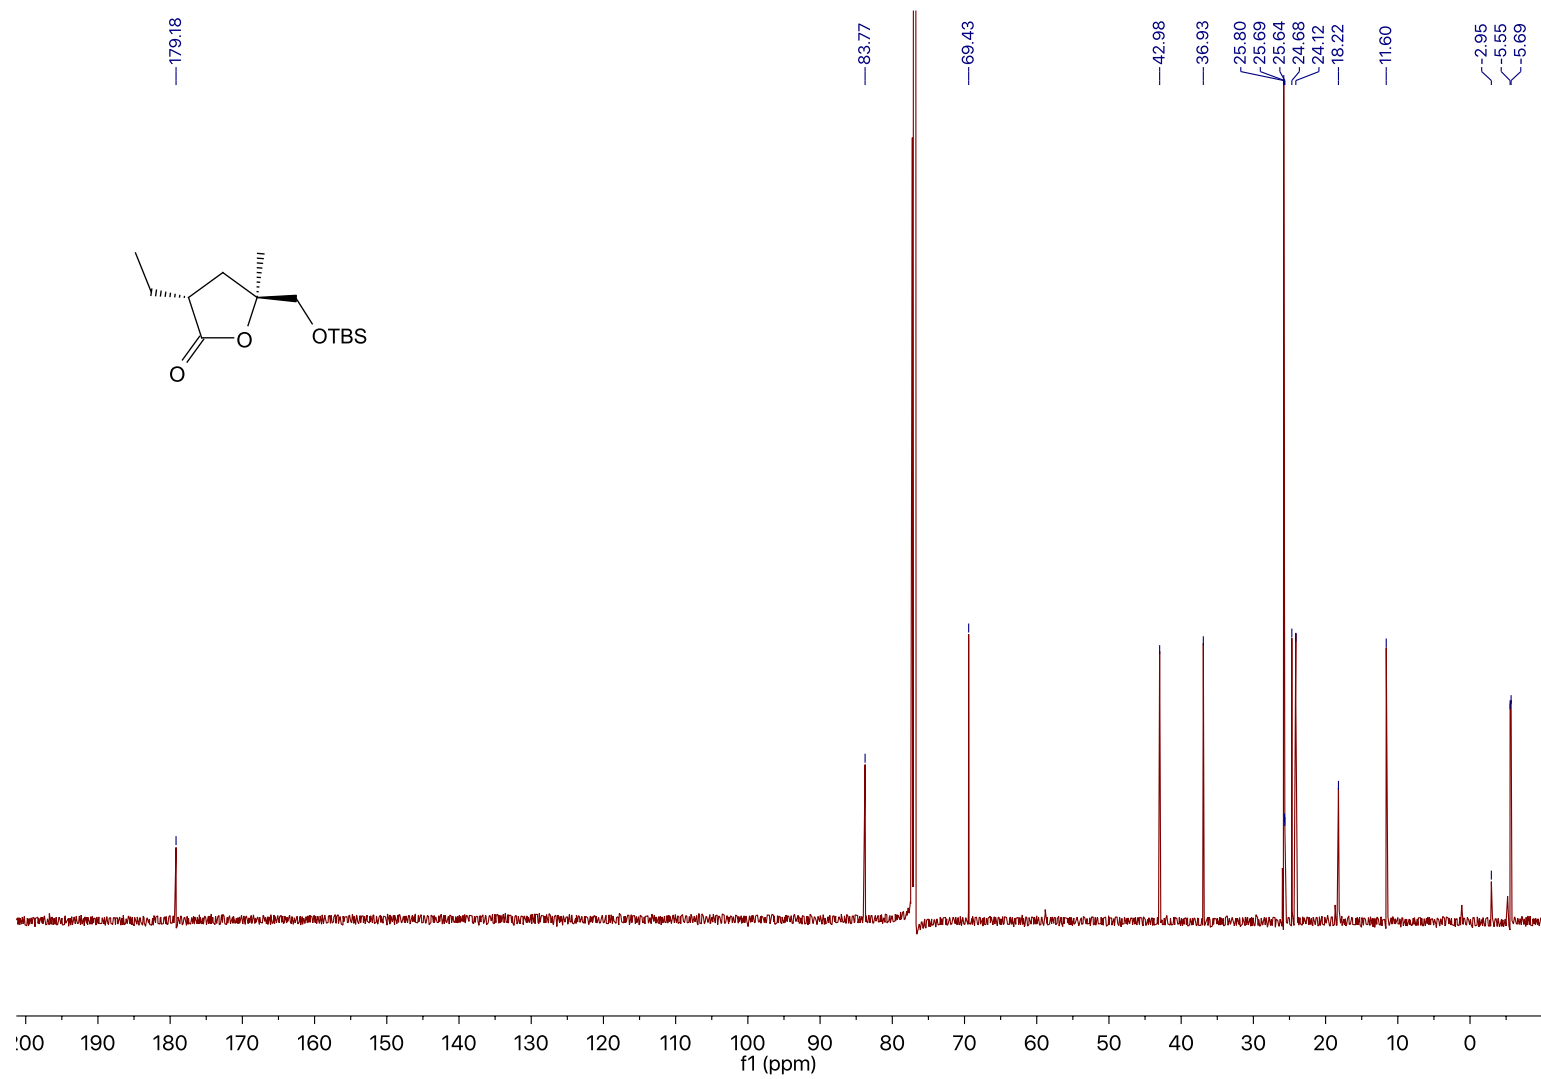

HRMS data

High Resolution Spectra  
Positive ion

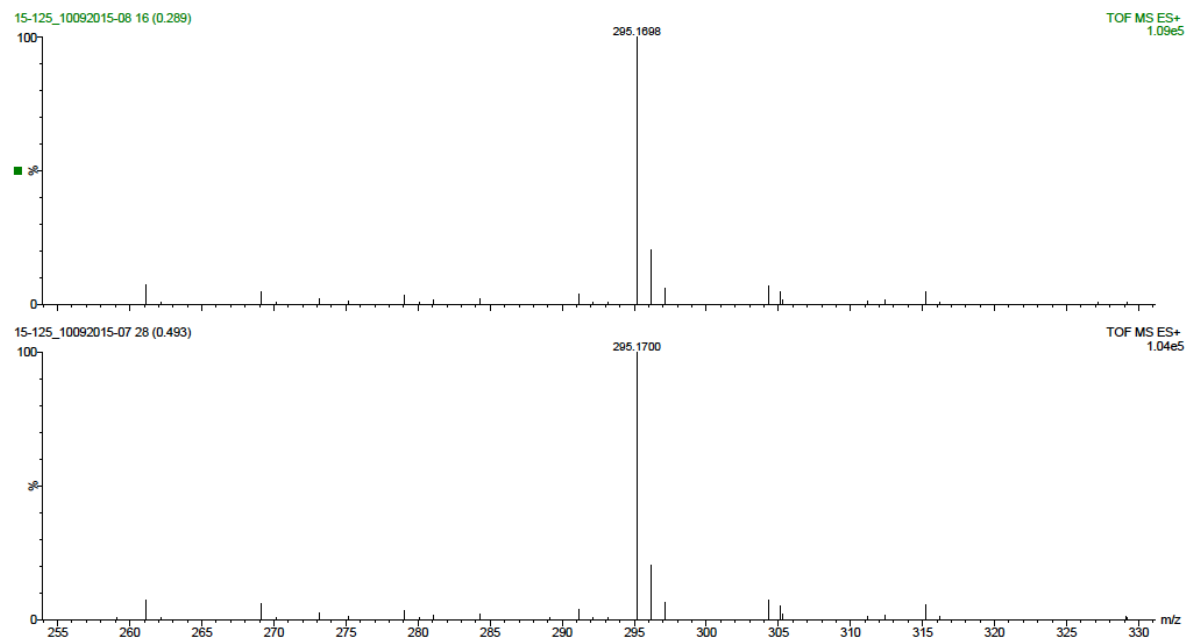

Accurate Mass Data

| Observed Mass | Formula [M+Na] <sup>+</sup>                         | Calculated mass | Difference (ppm) | iFit (norm) |
|---------------|-----------------------------------------------------|-----------------|------------------|-------------|
| 295.1700      | C <sub>14</sub> H <sub>28</sub> O <sub>3</sub> SiNa | 295.1705        | -1.7             | 5.2         |
| 295.1698      | C <sub>14</sub> H <sub>28</sub> O <sub>3</sub> SiNa | 295.1705        | -2.4             | 5.0         |

$^1\text{H}$ ,  $^{13}\text{C}$  NMR and HRMS (ESI) data for compound **18a**

$^1\text{H}$  NMR data

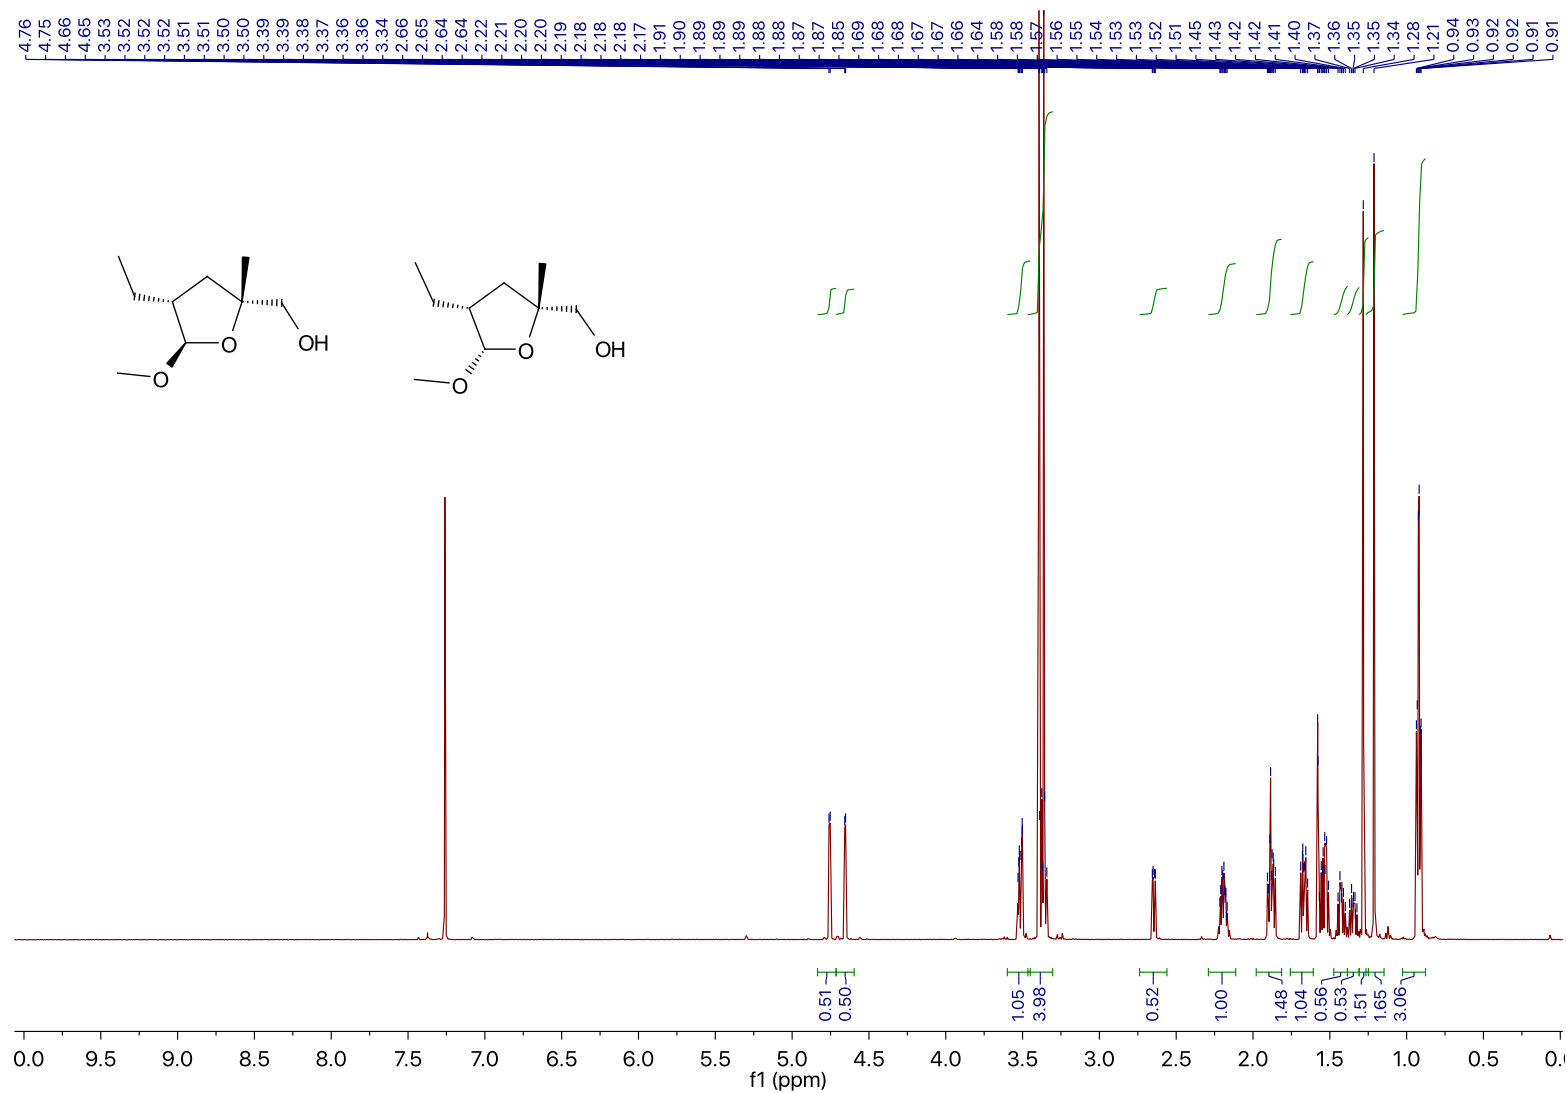

$^{13}\text{C}$  NMR data

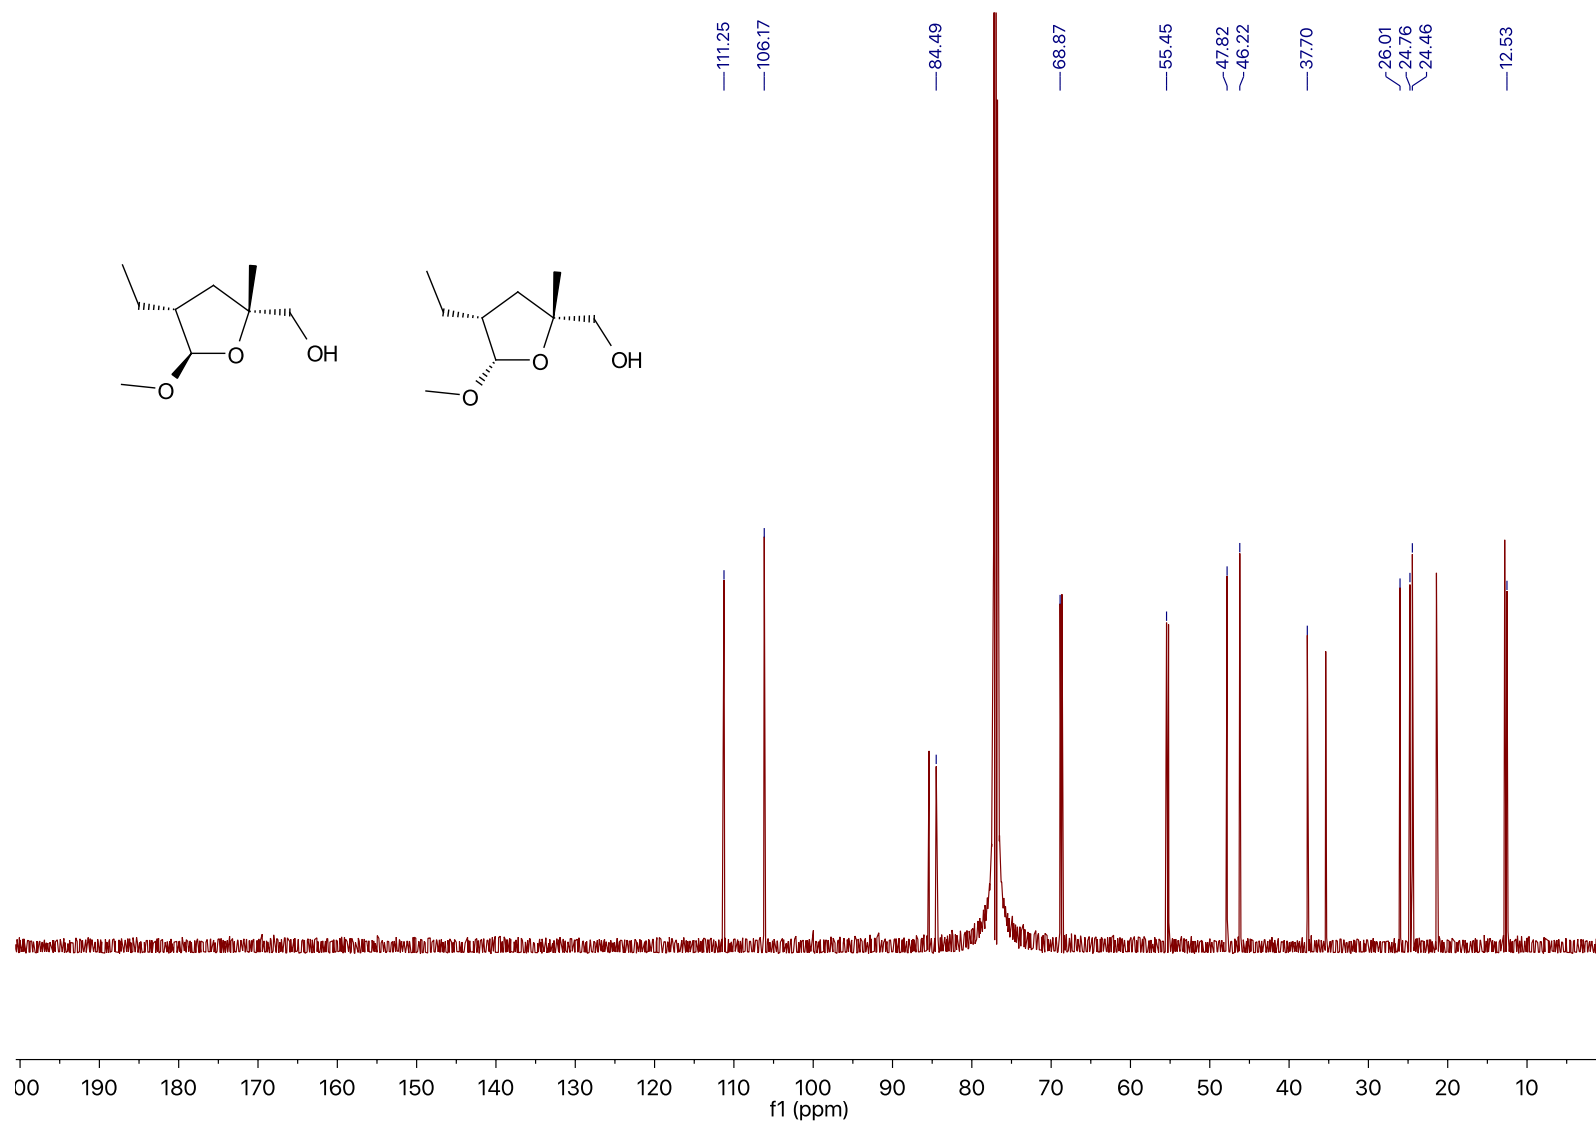

HRMS data

High Resolution Spectra  
Positive ion

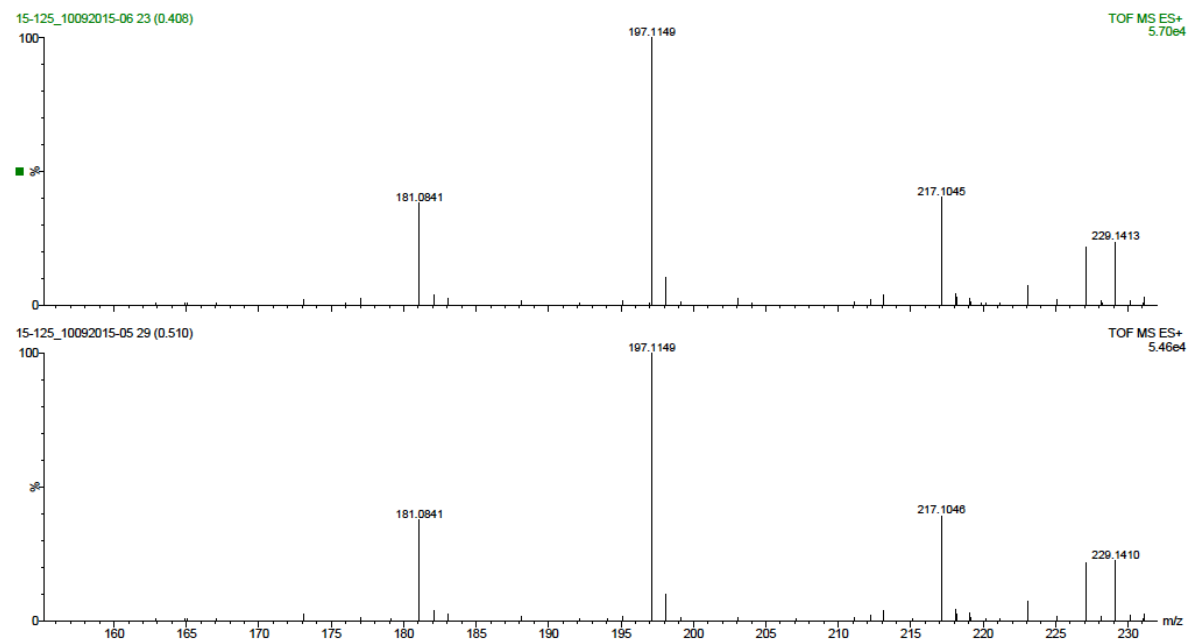

Accurate Mass Data

| Observed Mass | Formula [M+Na] <sup>+</sup>                      | Calculated mass | Difference (ppm) | iFit (norm) |
|---------------|--------------------------------------------------|-----------------|------------------|-------------|
| 197.1149      | C <sub>9</sub> H <sub>18</sub> O <sub>3</sub> Na | 197.1154        | -2.5             | 0.0         |
| 197.1149      | C <sub>9</sub> H <sub>18</sub> O <sub>3</sub> Na | 197.1154        | -2.5             | 0.0         |

$^1\text{H}$ ,  $^{13}\text{C}$  NMR and HRMS (ESI) data for compound **18b**

$^1\text{H}$  NMR data

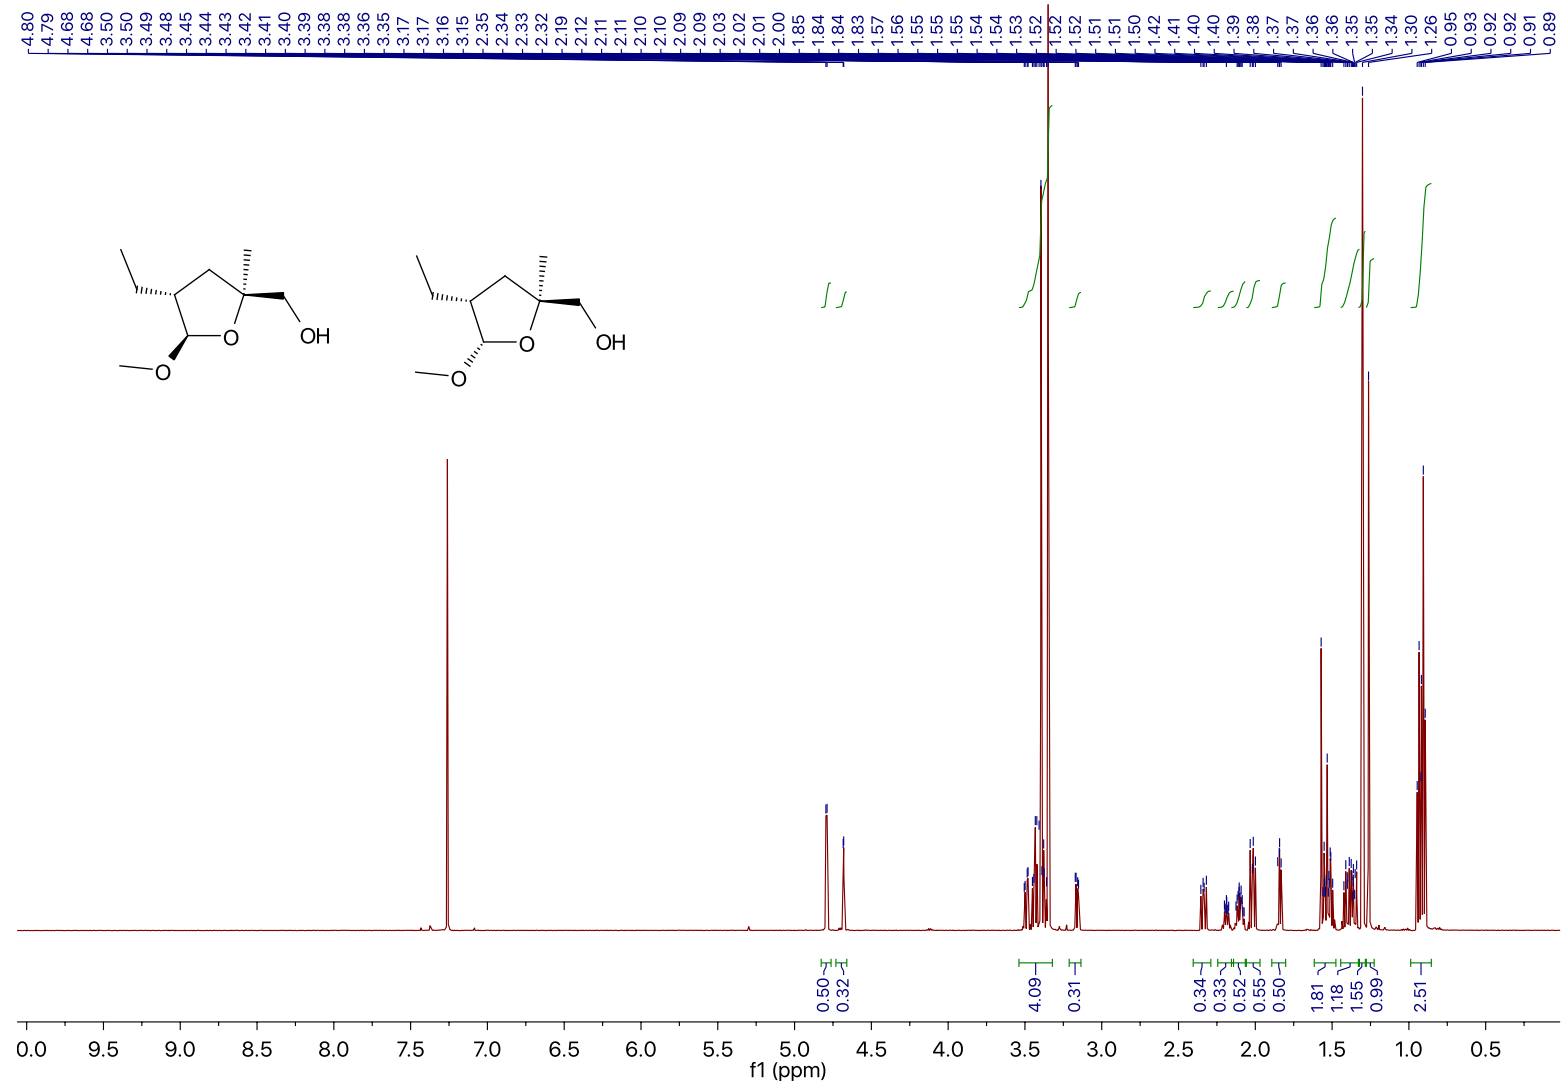

$^{13}\text{C}$  NMR data

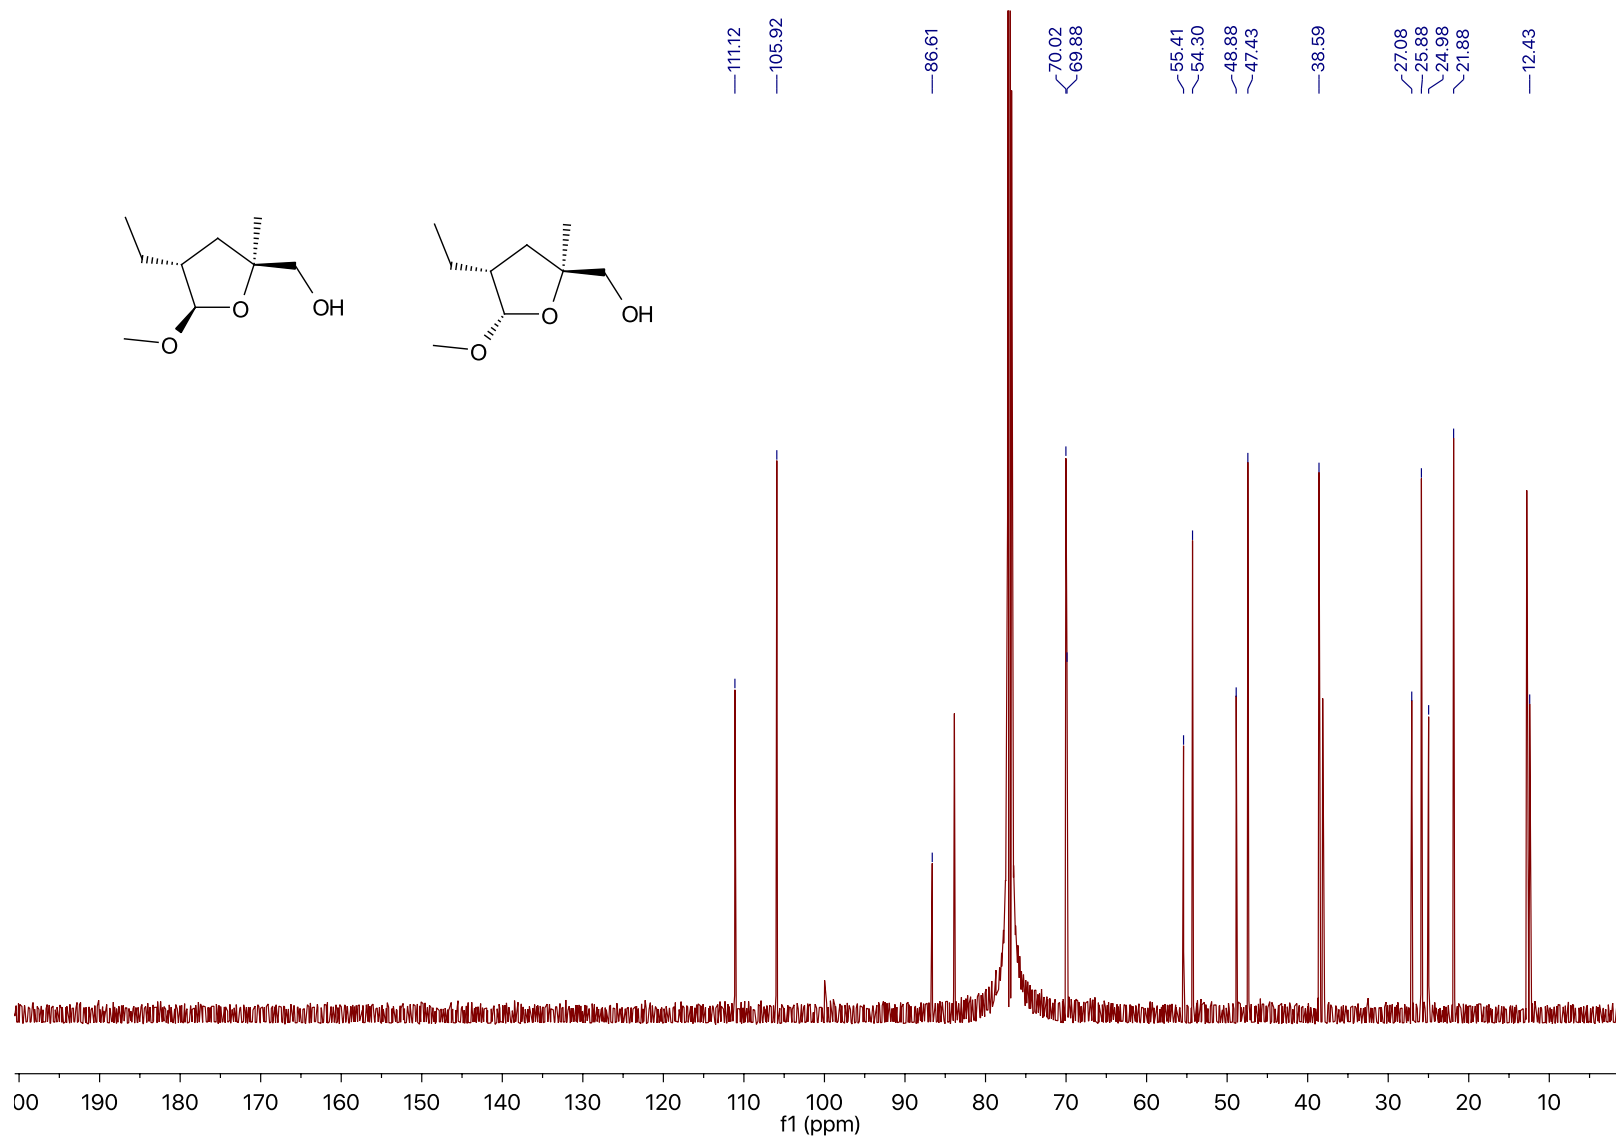

HRMS data

High Resolution Spectra  
Positive ion

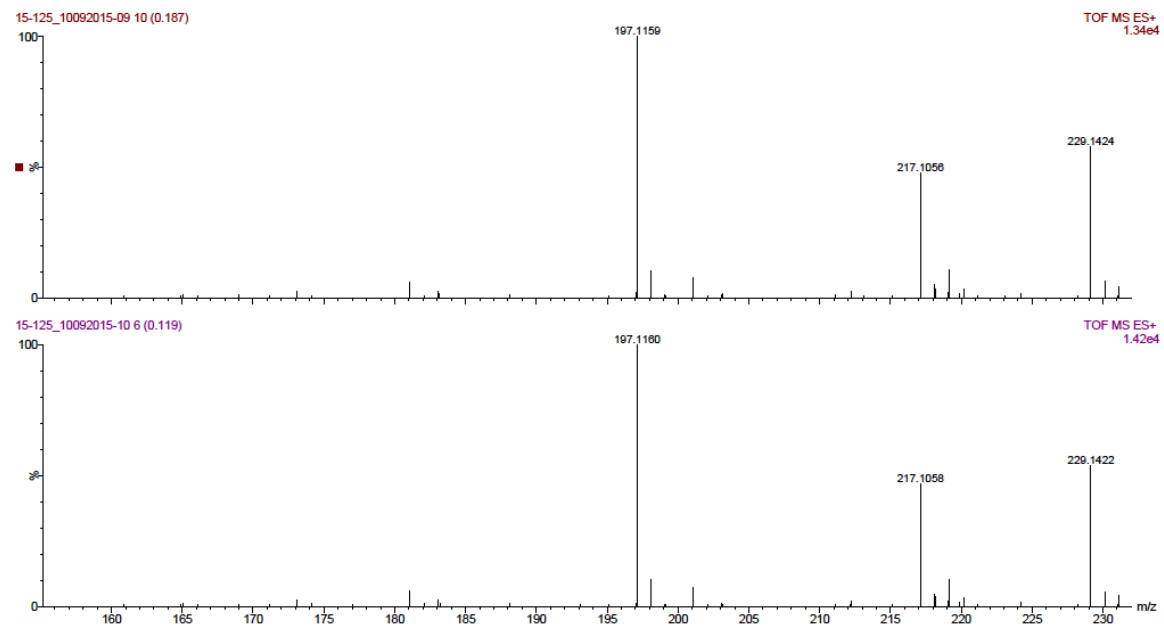

Accurate Mass Data

| Observed Mass | Formula [M+Na] <sup>+</sup>                      | Calculated mass | Difference (ppm) | iFit (norm) |
|---------------|--------------------------------------------------|-----------------|------------------|-------------|
| 197.1160      | C <sub>9</sub> H <sub>18</sub> O <sub>3</sub> Na | 197.1154        | 3.0              | 0.0         |
| 197.1159      | C <sub>9</sub> H <sub>18</sub> O <sub>3</sub> Na | 197.1154        | 2.5              | 0.0         |



$^1\text{H}$ ,  $^{13}\text{C}$  NMR and HRMS (ESI) data for compound **11a**

$^1\text{H}$  NMR data

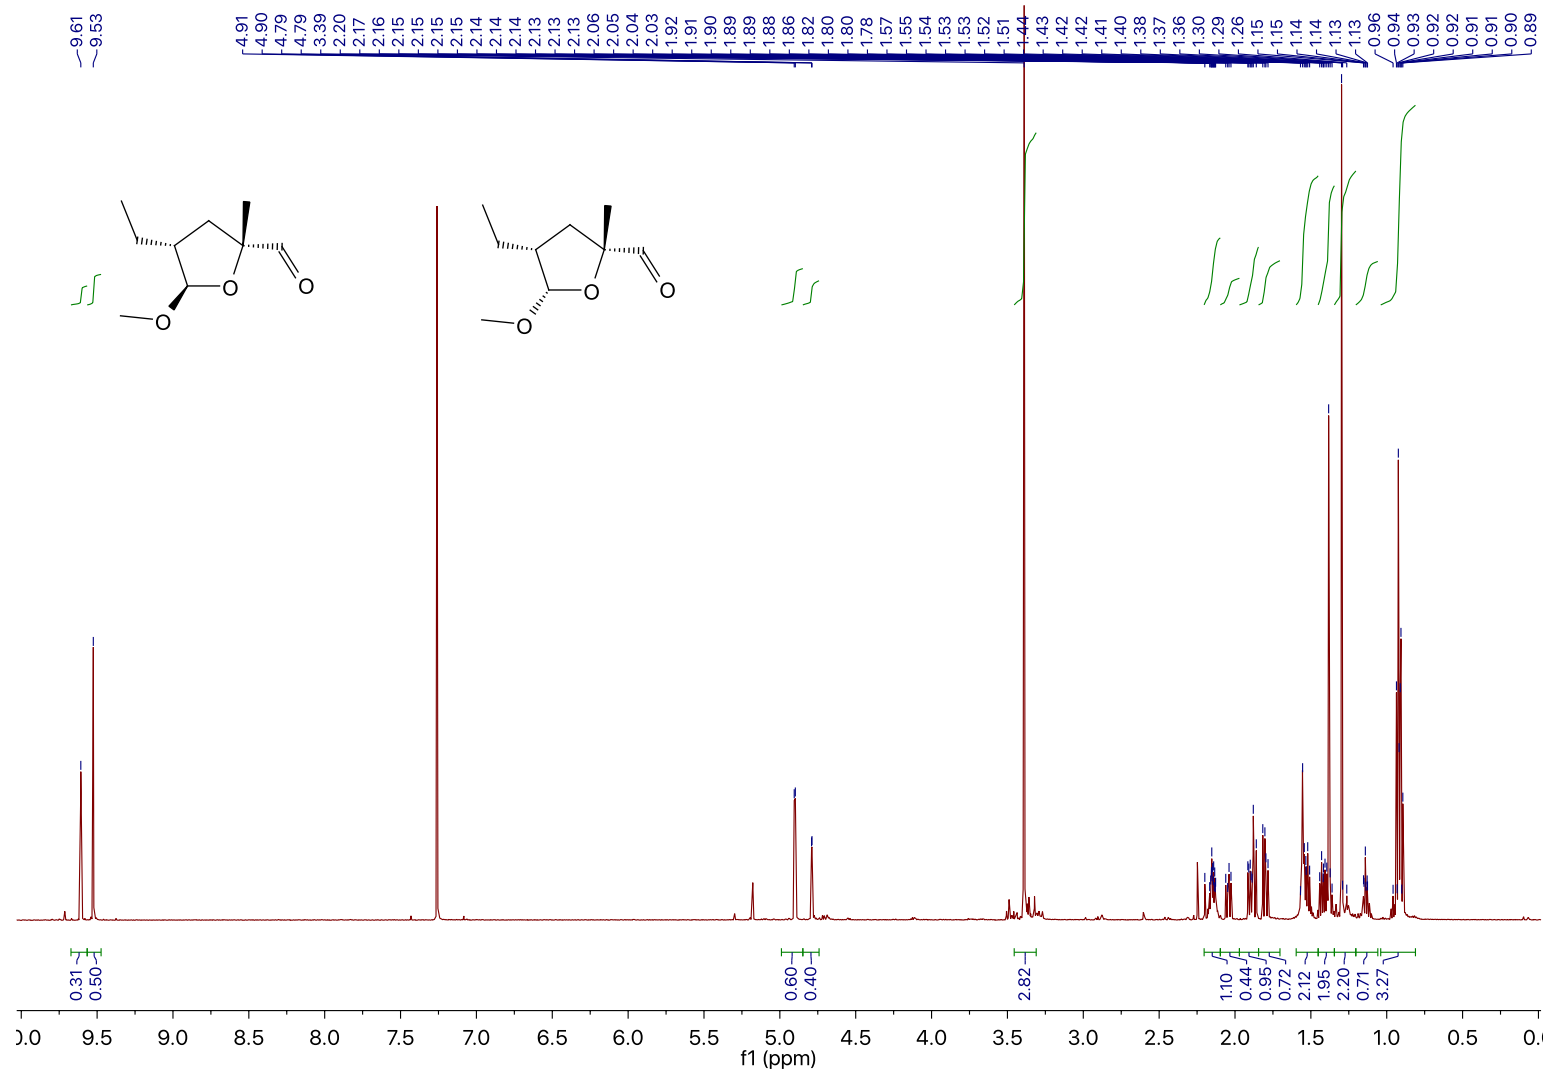

$^{13}\text{C}$  NMR data

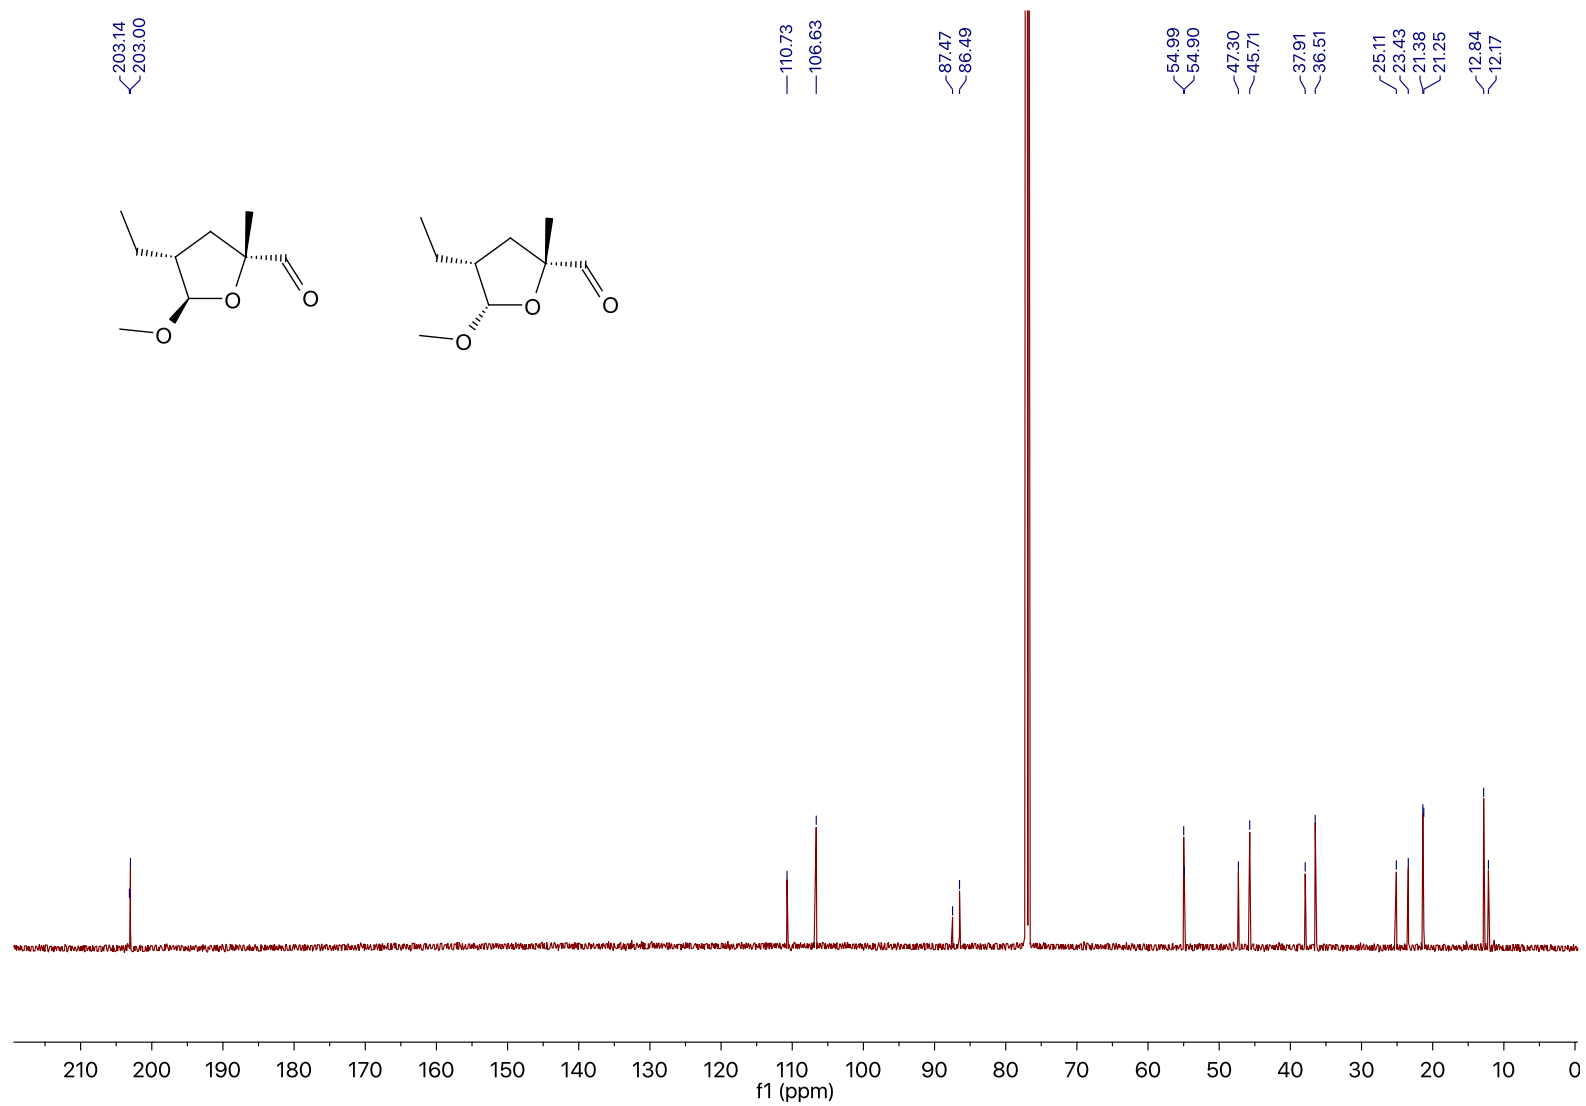

HRMS data

High Resolution Spectra  
Positive ion

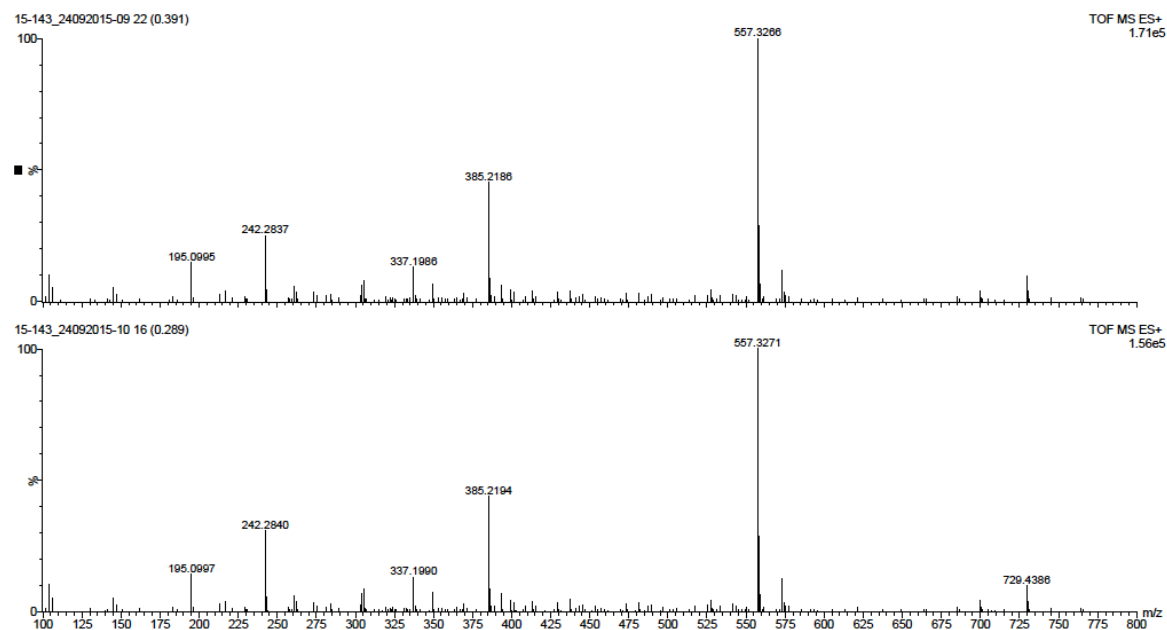

Accurate Mass Data

| Observed Mass | Formula [M+Na] <sup>+</sup>                      | Calculated mass | Difference (ppm) | iFiT (norm) |
|---------------|--------------------------------------------------|-----------------|------------------|-------------|
| 195.0997      | C <sub>9</sub> H <sub>16</sub> O <sub>3</sub> Na | 195.0997        | 0.0              | 0.0         |
| 195.0995      | C <sub>9</sub> H <sub>16</sub> O <sub>3</sub> Na | 195.0997        | -1.0             | 0.0         |

$^1\text{H}$ ,  $^{13}\text{C}$  NMR and HRMS (ESI) data for compound **11b**

$^1\text{H}$  NMR data

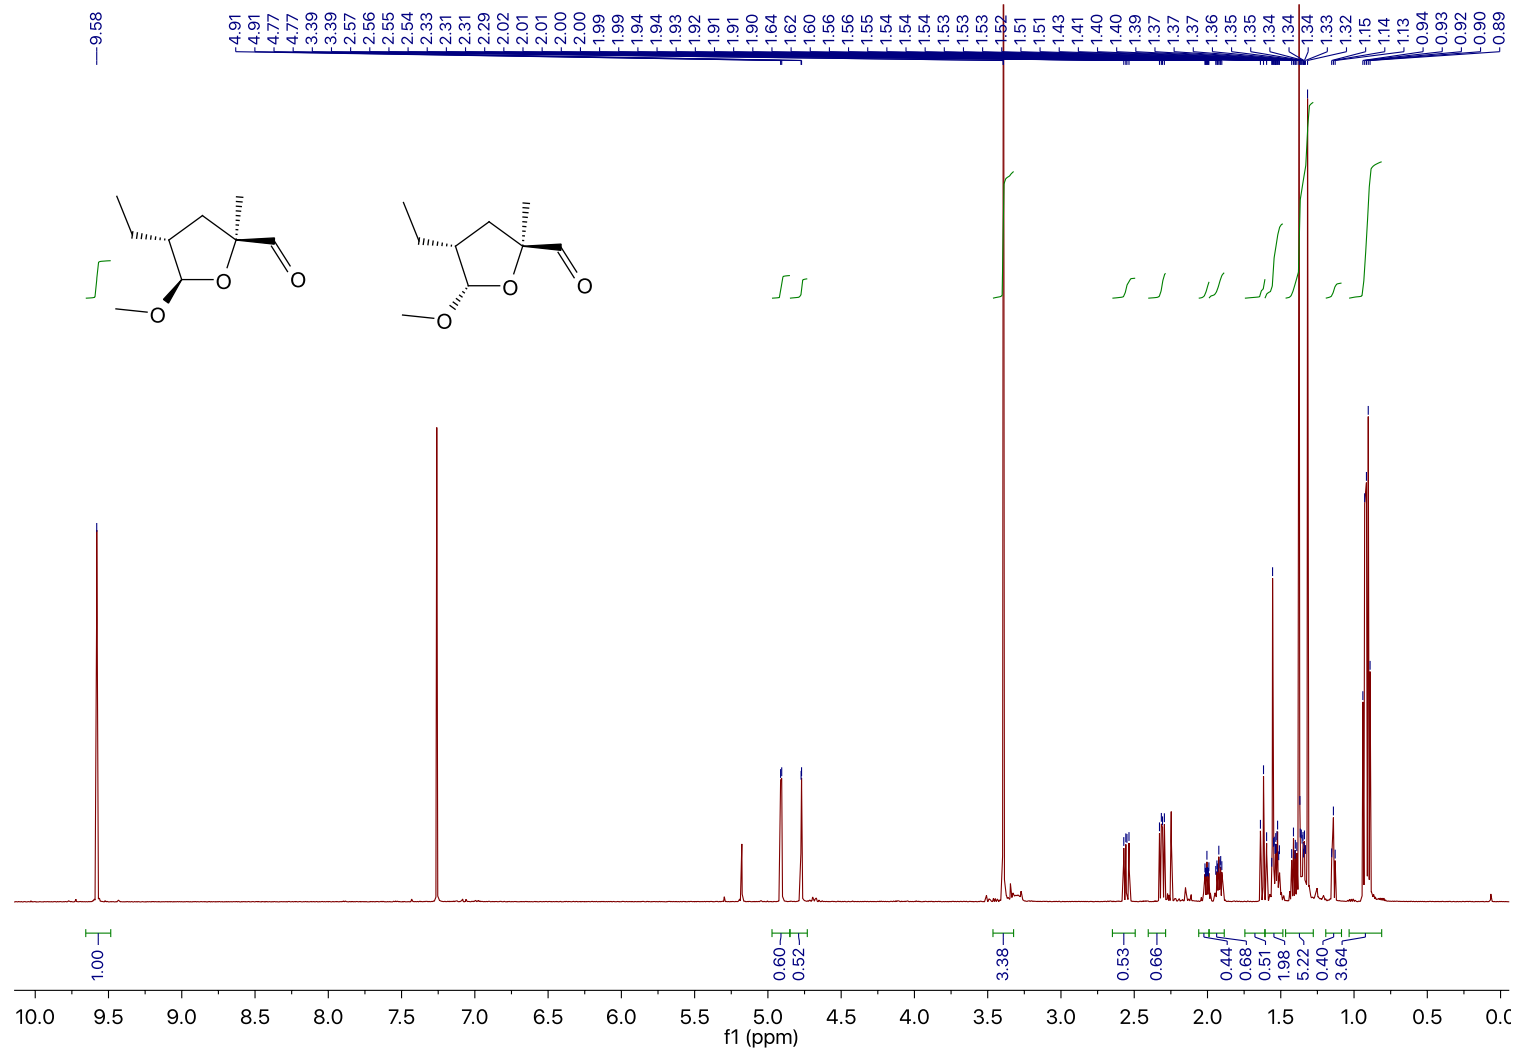

$^{13}\text{C}$  NMR data

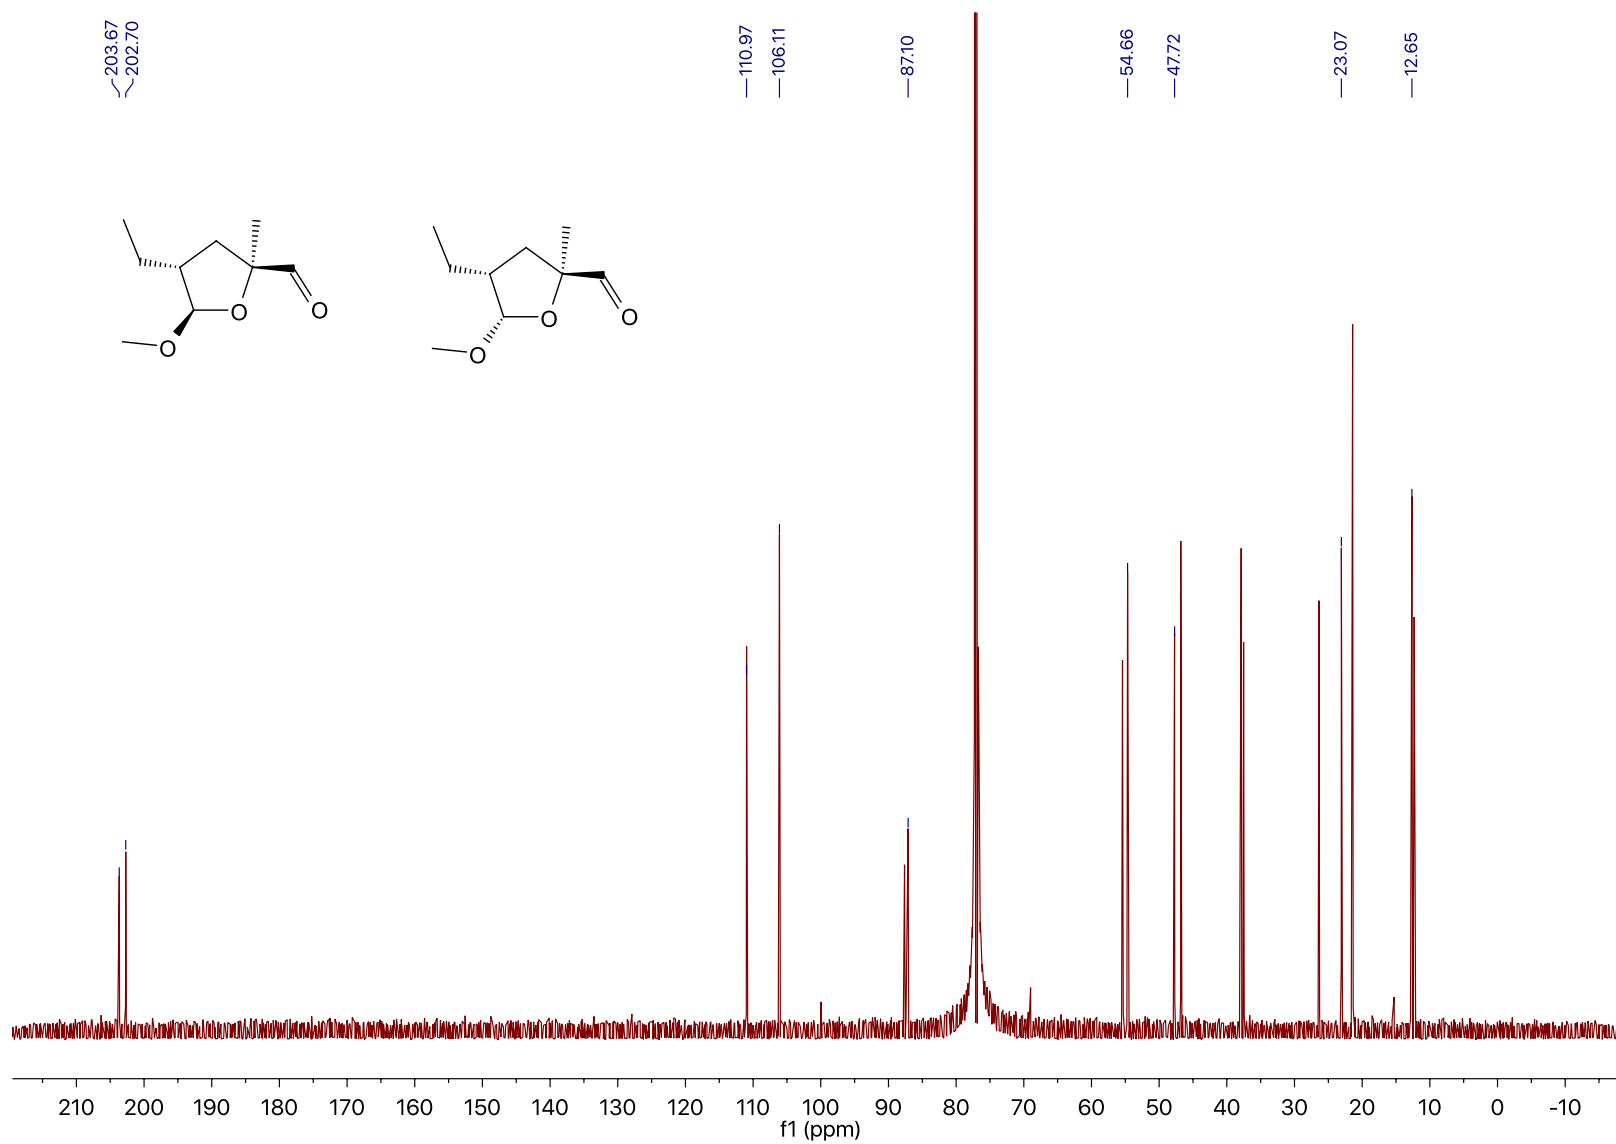

HRMS data

High Resolution Spectra  
Positive ion

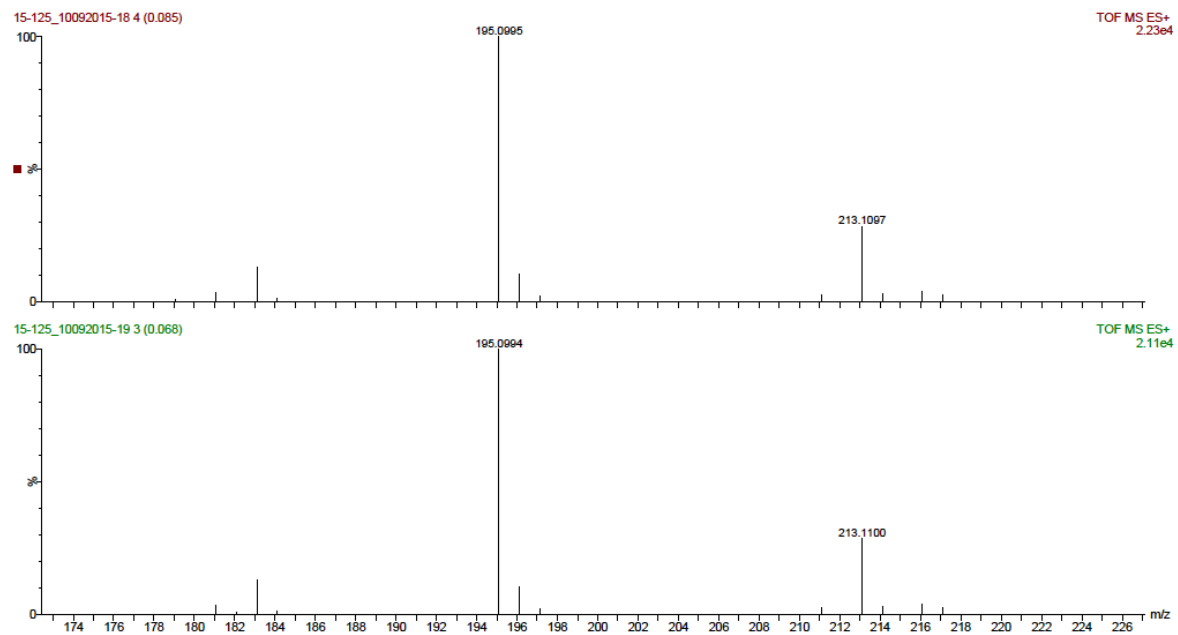

Accurate Mass Data

| Observed Mass | Formula [M+Na] <sup>+</sup>                      | Calculated mass | Difference (ppm) | iFit (norm) |
|---------------|--------------------------------------------------|-----------------|------------------|-------------|
| 195.0994      | C <sub>9</sub> H <sub>16</sub> O <sub>3</sub> Na | 195.0997        | -1.5             | 0.0         |
| 195.0995      | C <sub>9</sub> H <sub>16</sub> O <sub>3</sub> Na | 195.0997        | -1.0             | 0.0         |

$^1\text{H}$ ,  $^{13}\text{C}$  NMR and HRMS (ESI) data for compound **8a**

$^1\text{H}$  NMR data

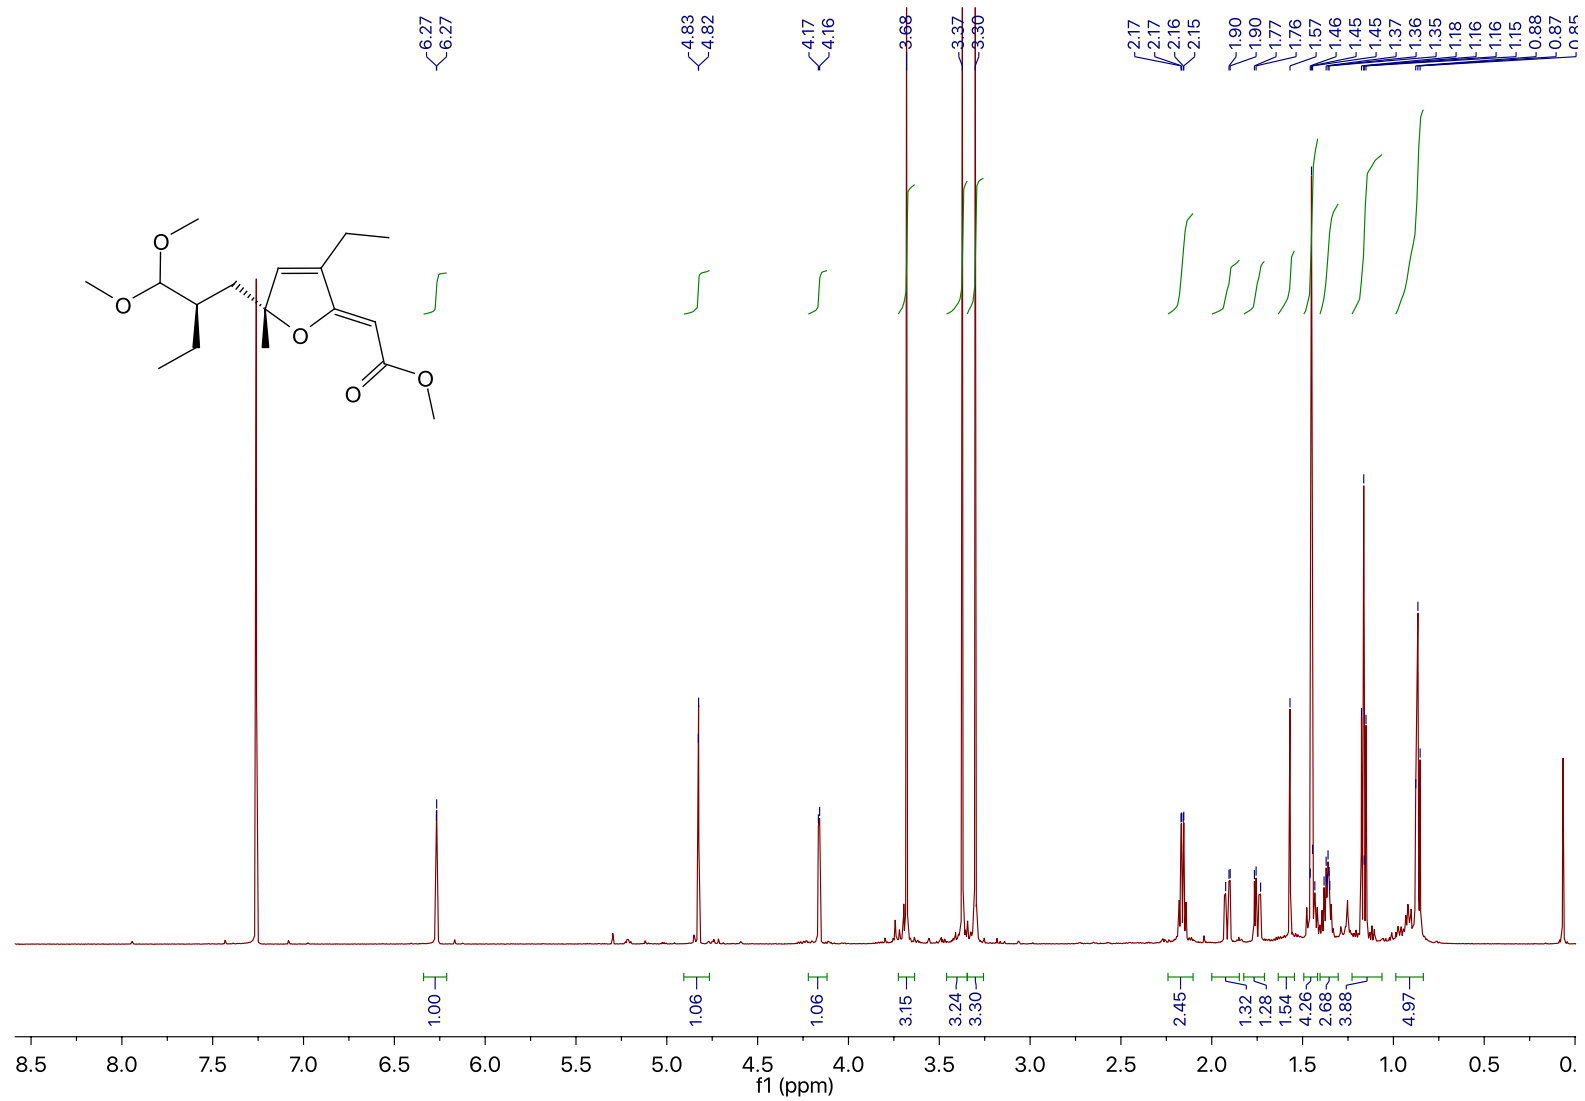

$^{13}\text{C}$  NMR data

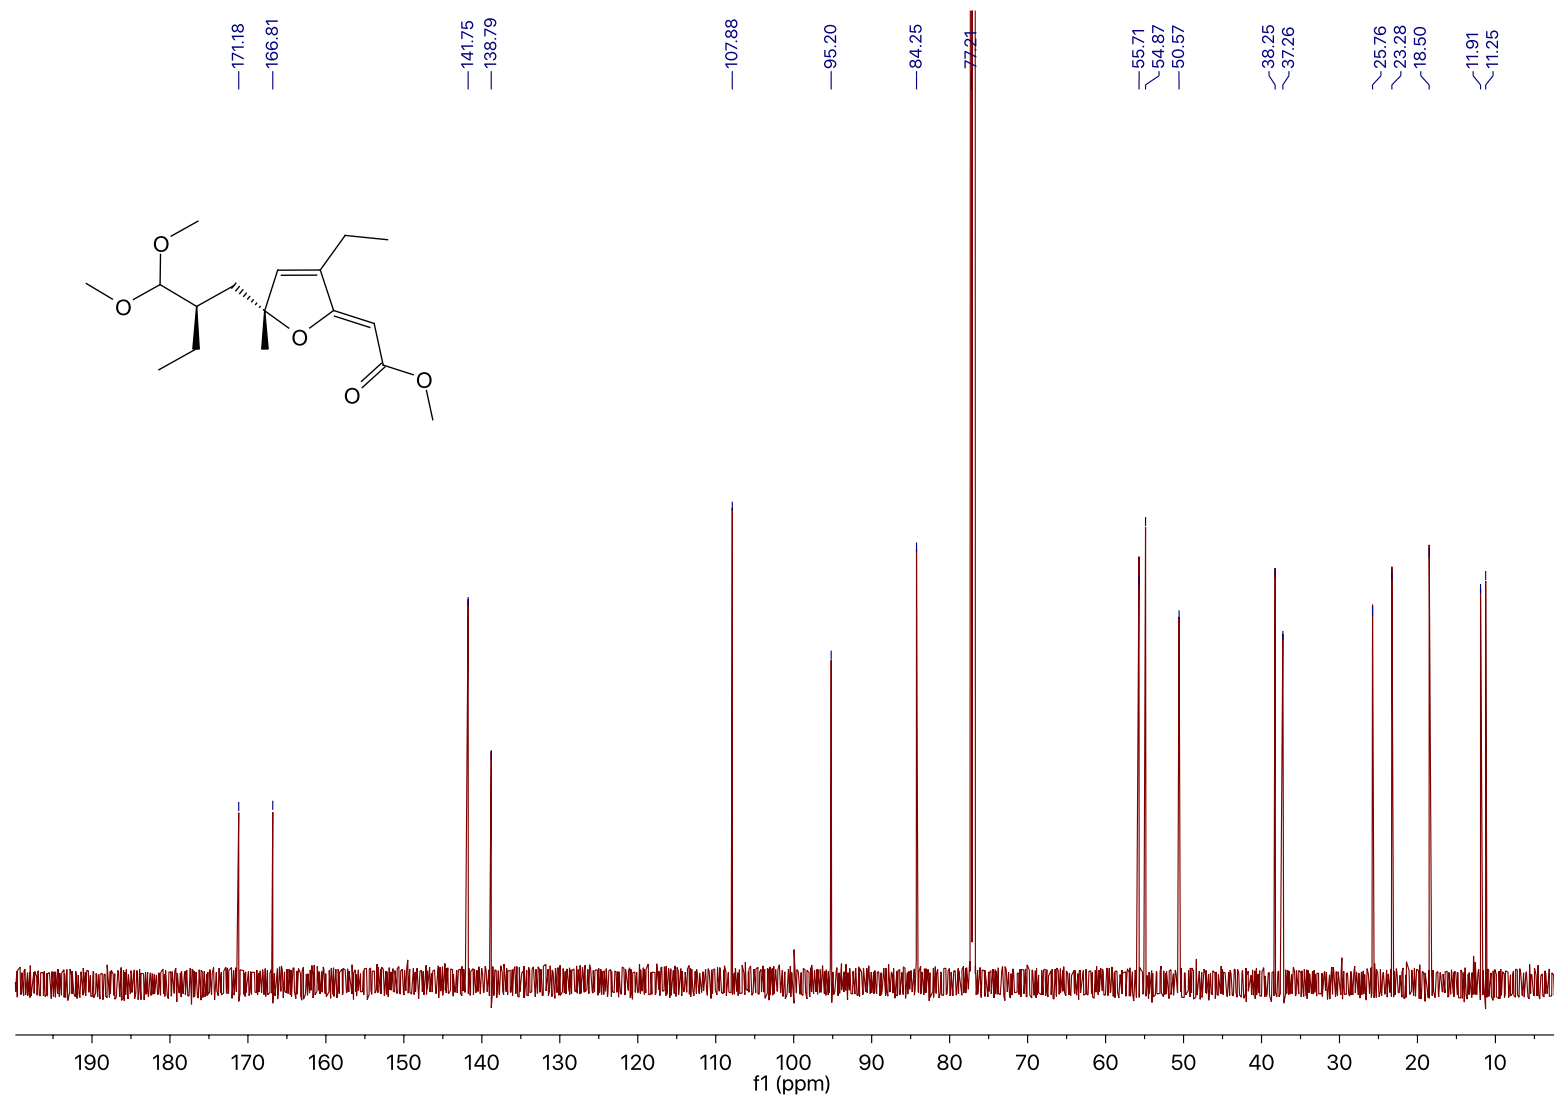



HRMS data

High Resolution Spectra  
Positive ion

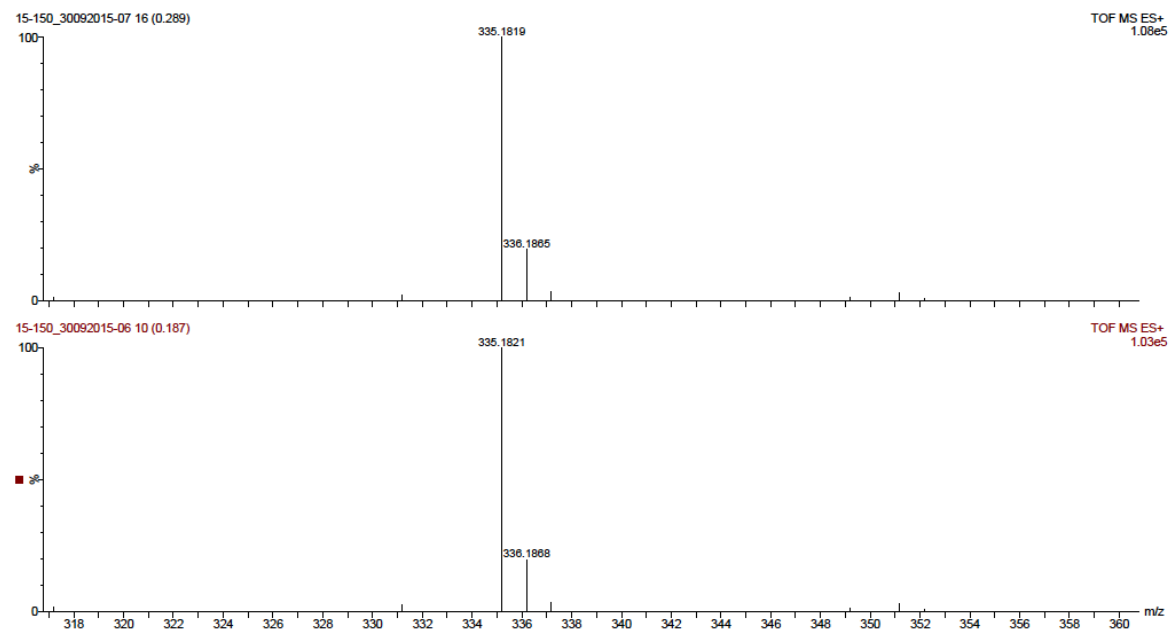

Accurate Mass Data

| Observed Mass | Formula [M+Na] <sup>+</sup>                       | Calculated mass | Difference (ppm) | iFit (norm) |
|---------------|---------------------------------------------------|-----------------|------------------|-------------|
| 335.1821      | C <sub>17</sub> H <sub>28</sub> O <sub>5</sub> Na | 335.1834        | -3.9             | 0.0         |
| 335.1819      | C <sub>17</sub> H <sub>28</sub> O <sub>5</sub> Na | 335.1834        | -4.5             | 0.0         |

$^1\text{H}$ ,  $^{13}\text{C}$  NMR and HRMS (ESI) data for compound **8b**

$^1\text{H}$  NMR data

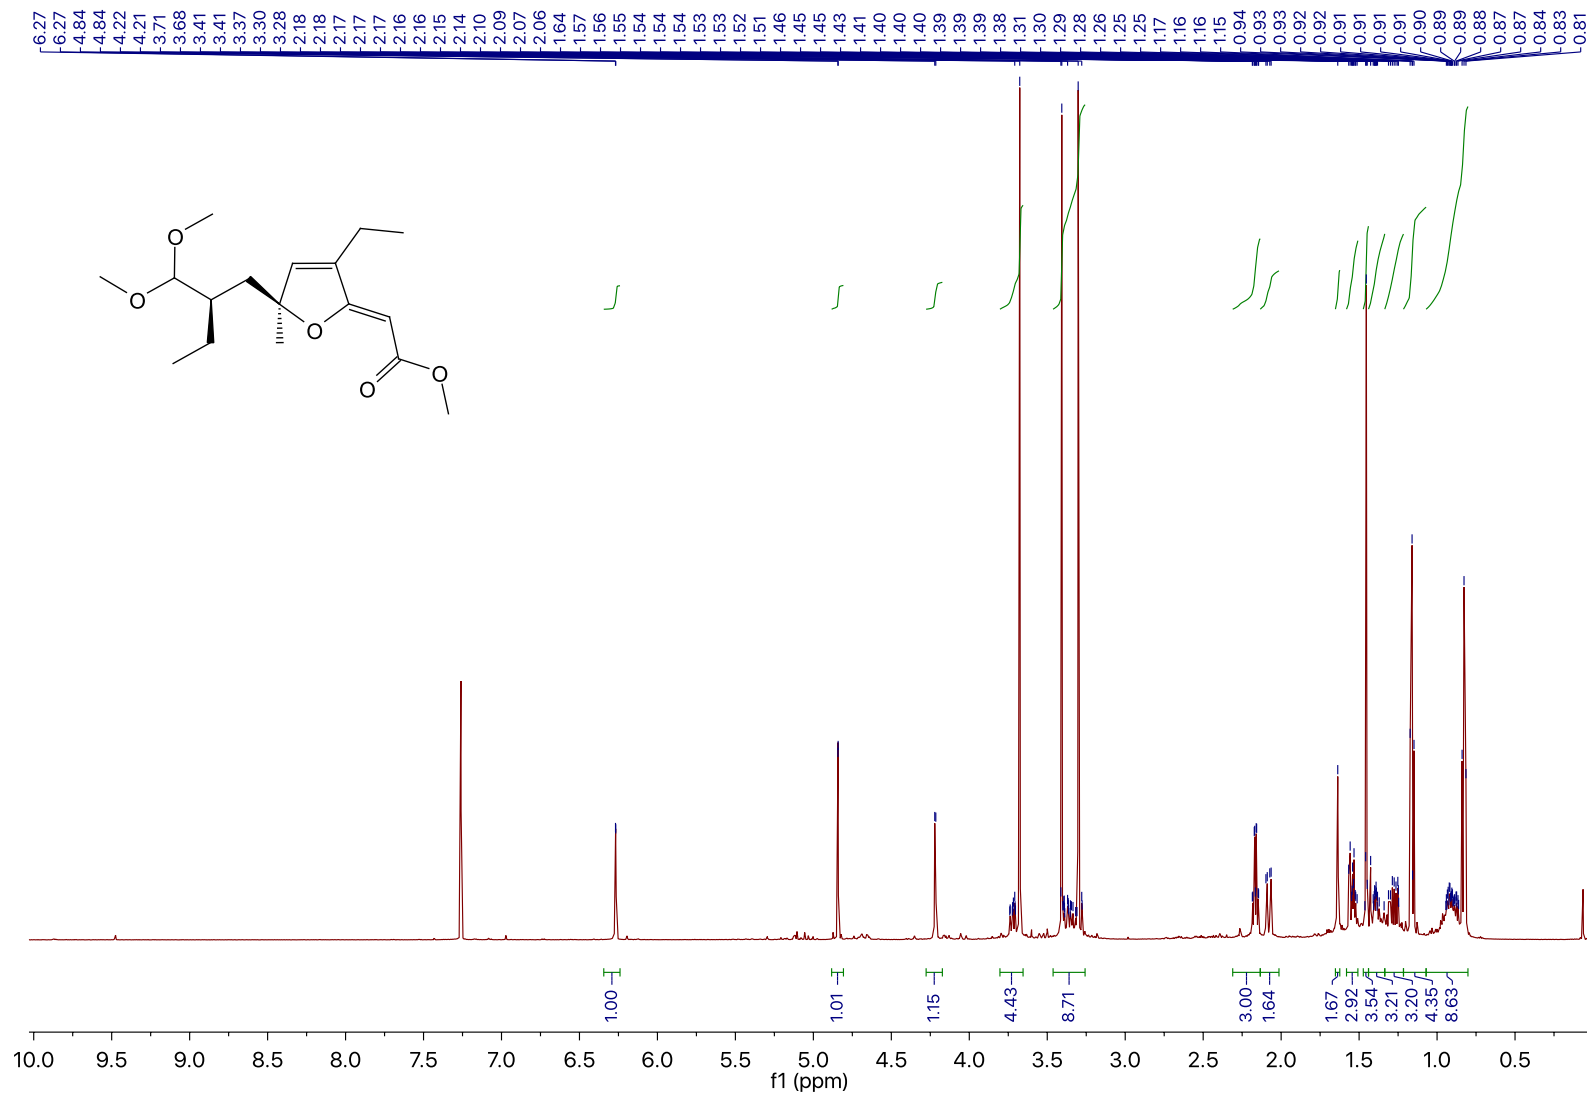

$^{13}\text{C}$  NMR data

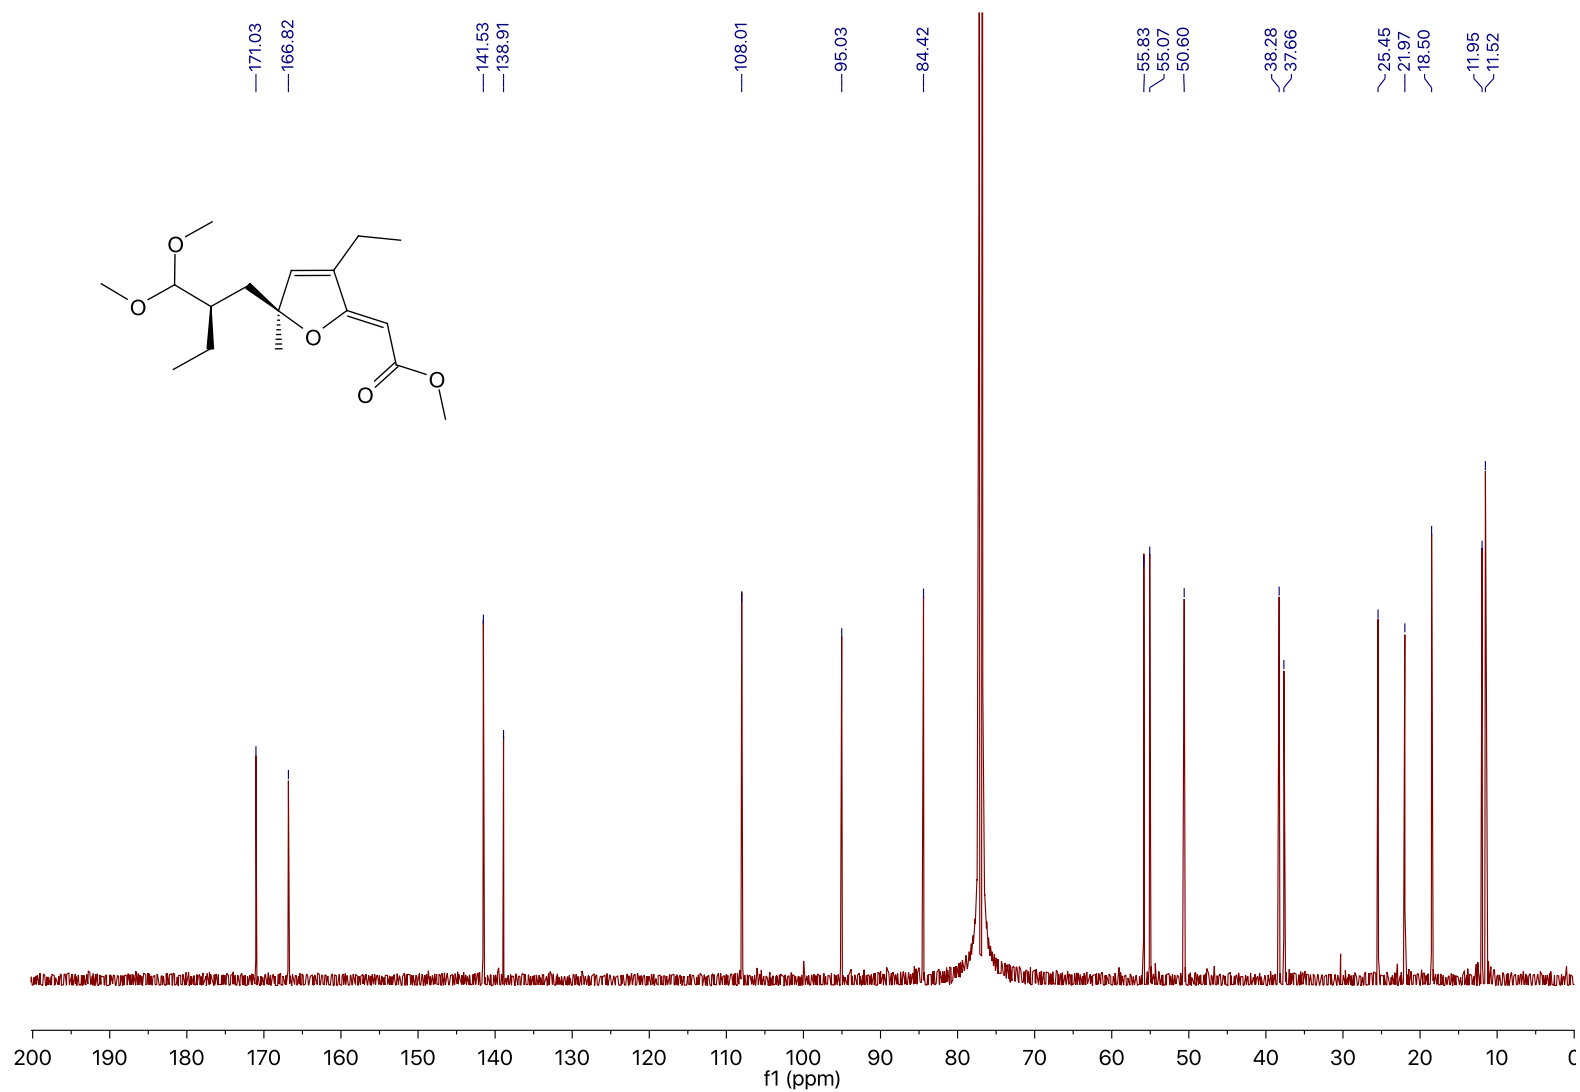

HRMS data

High Resolution Spectra  
Positive ion

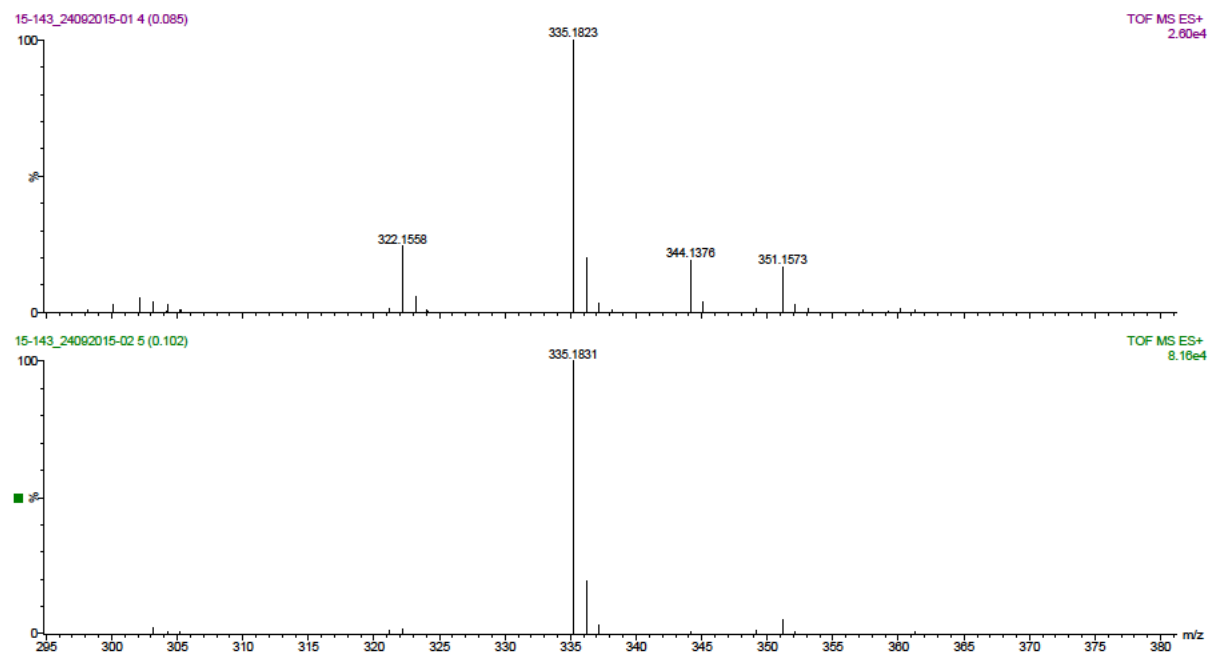

Accurate Mass Data

| Observed Mass | Formula [M+Na] <sup>+</sup>                       | Calculated mass | Difference (ppm) | iFit (norm) |
|---------------|---------------------------------------------------|-----------------|------------------|-------------|
| 335.1831      | C <sub>17</sub> H <sub>28</sub> O <sub>5</sub> Na | 335.1834        | -0.9             | 2.0         |
| 335.1823      | C <sub>17</sub> H <sub>28</sub> O <sub>5</sub> Na | 335.1834        | -3.3             | 0.1         |

$^1\text{H}$ ,  $^{13}\text{C}$ , COSY, HSQC NMR and HRMS (ESI) data for compound **1a**

$^1\text{H}$  NMR data

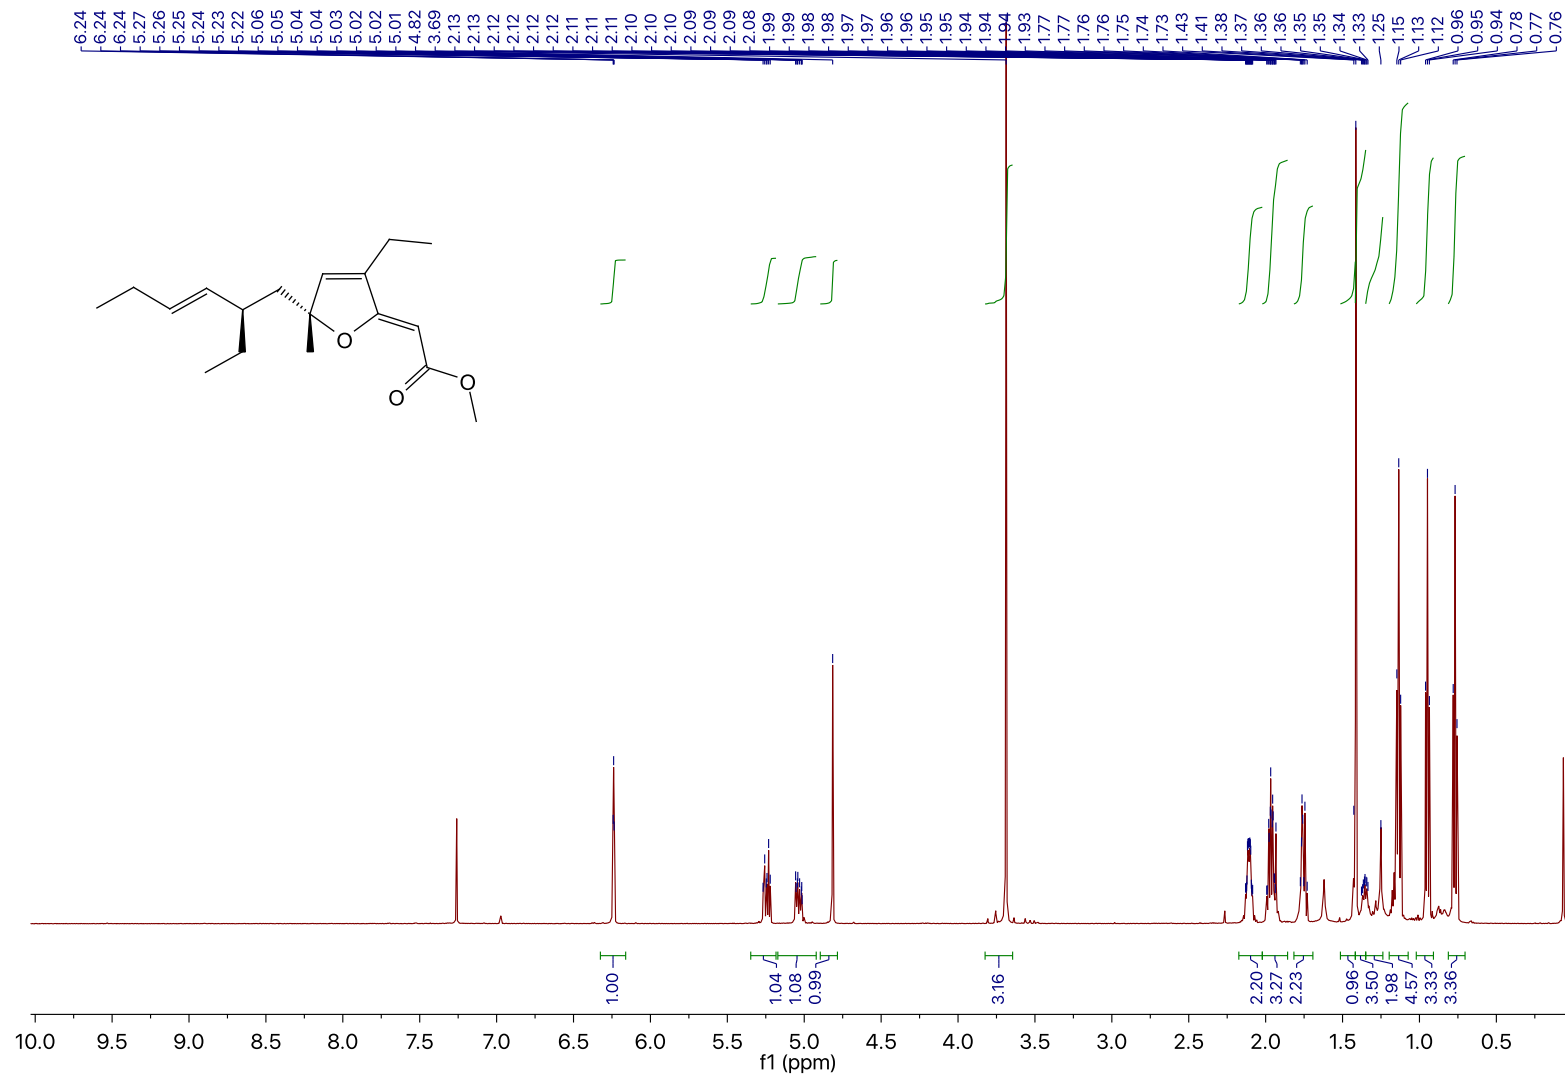

$^{13}\text{C}$  NMR data

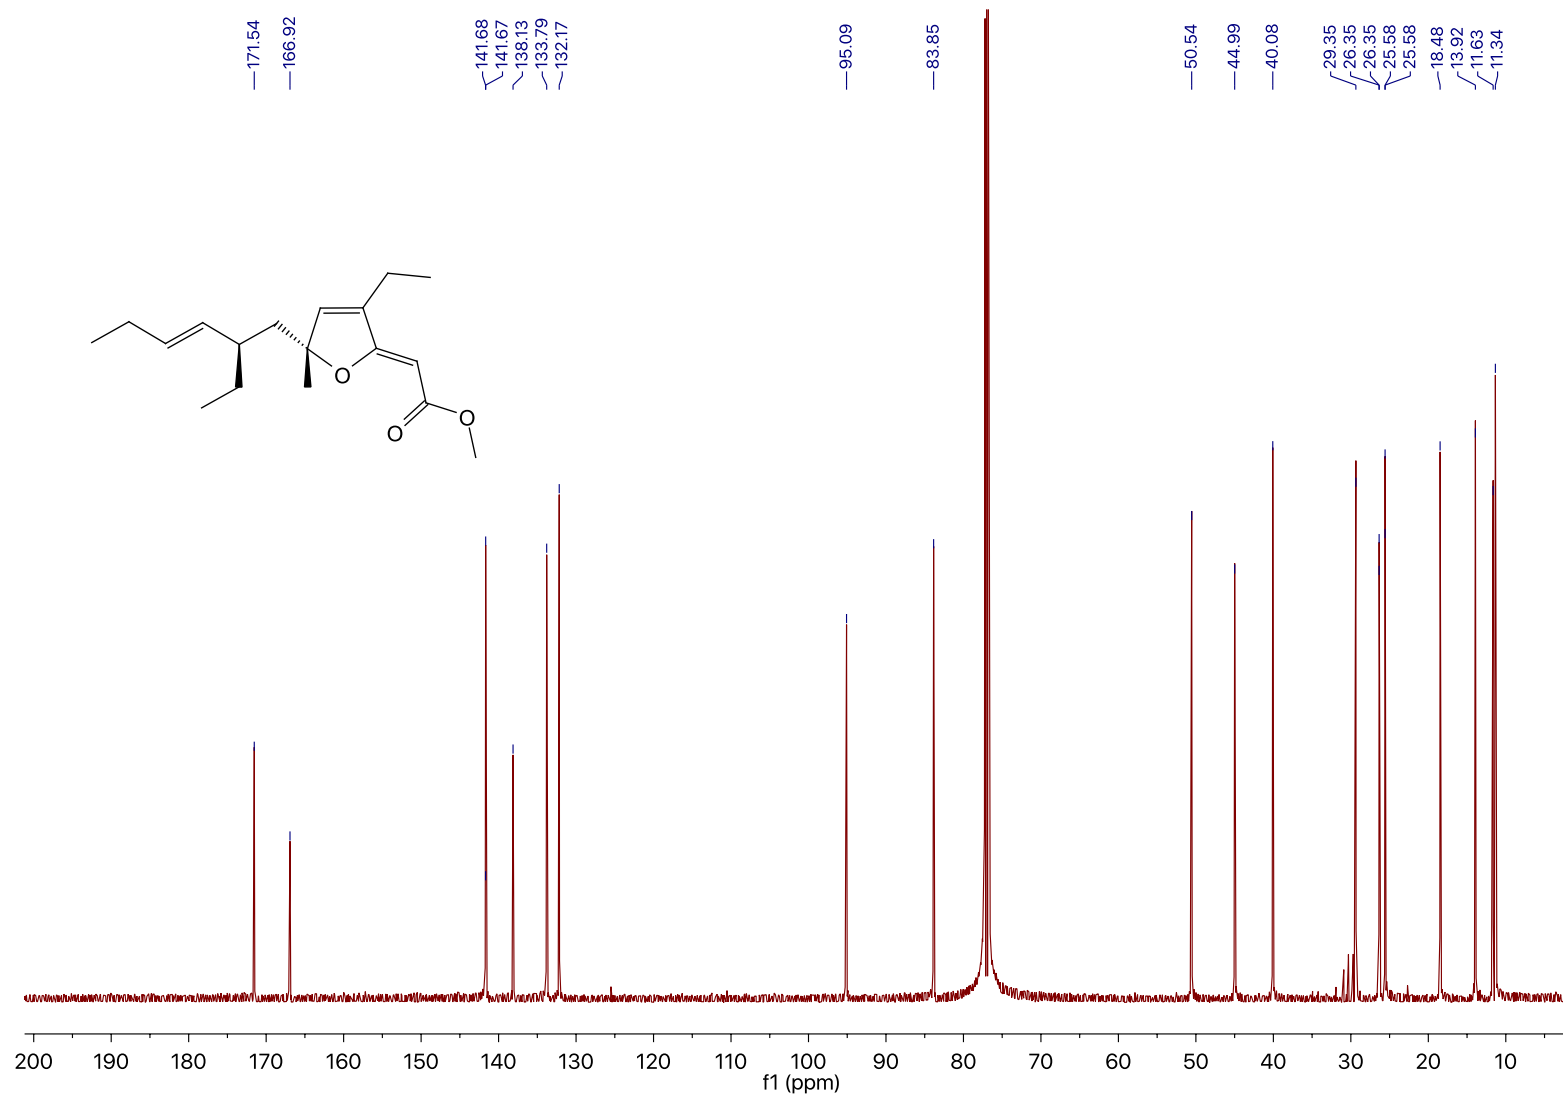

2D NMR Data **1a**  
COSY

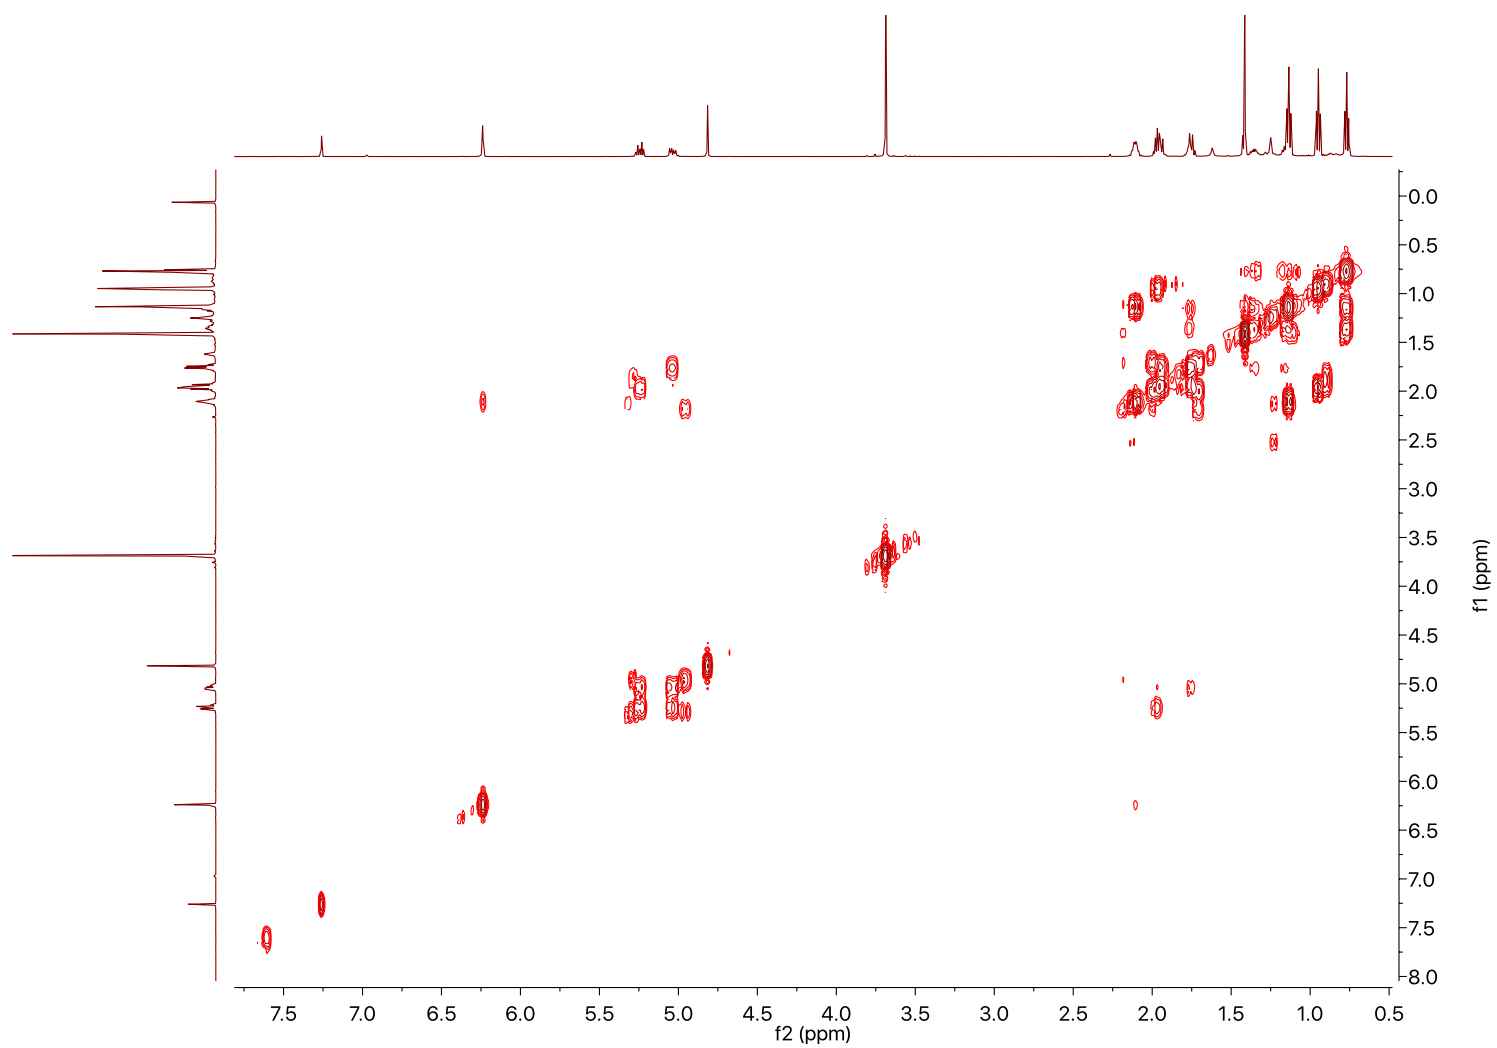

HSQC

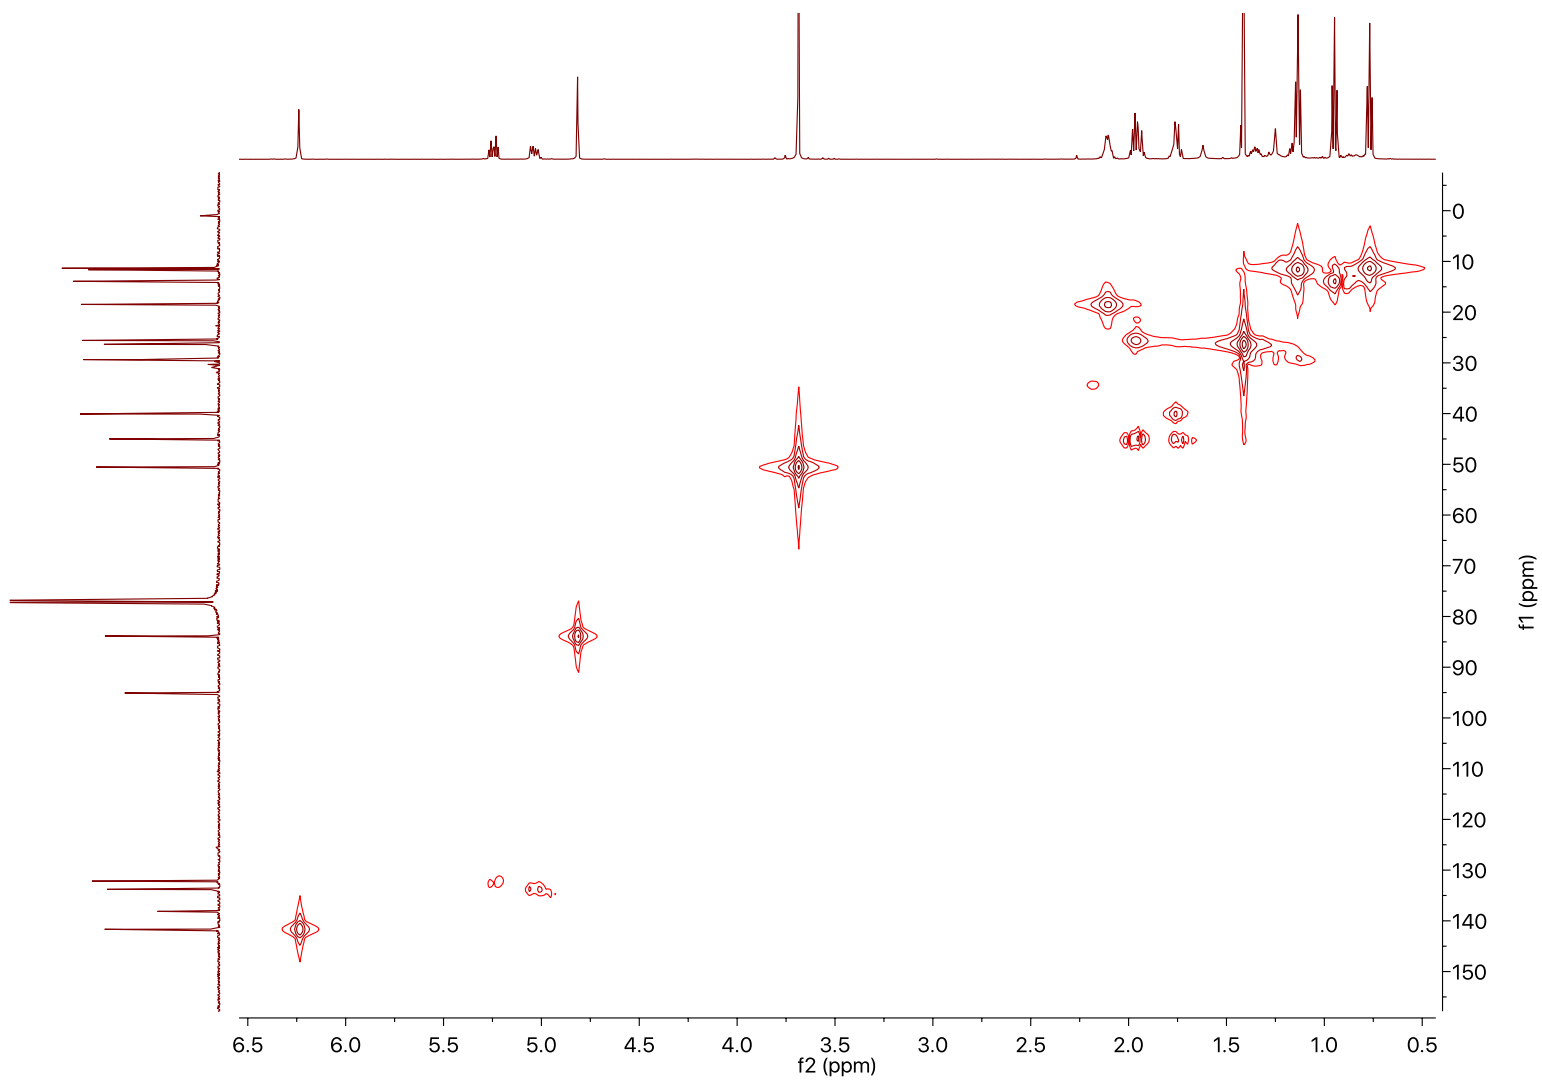



HRMS data

High Resolution Spectra  
Positive ion

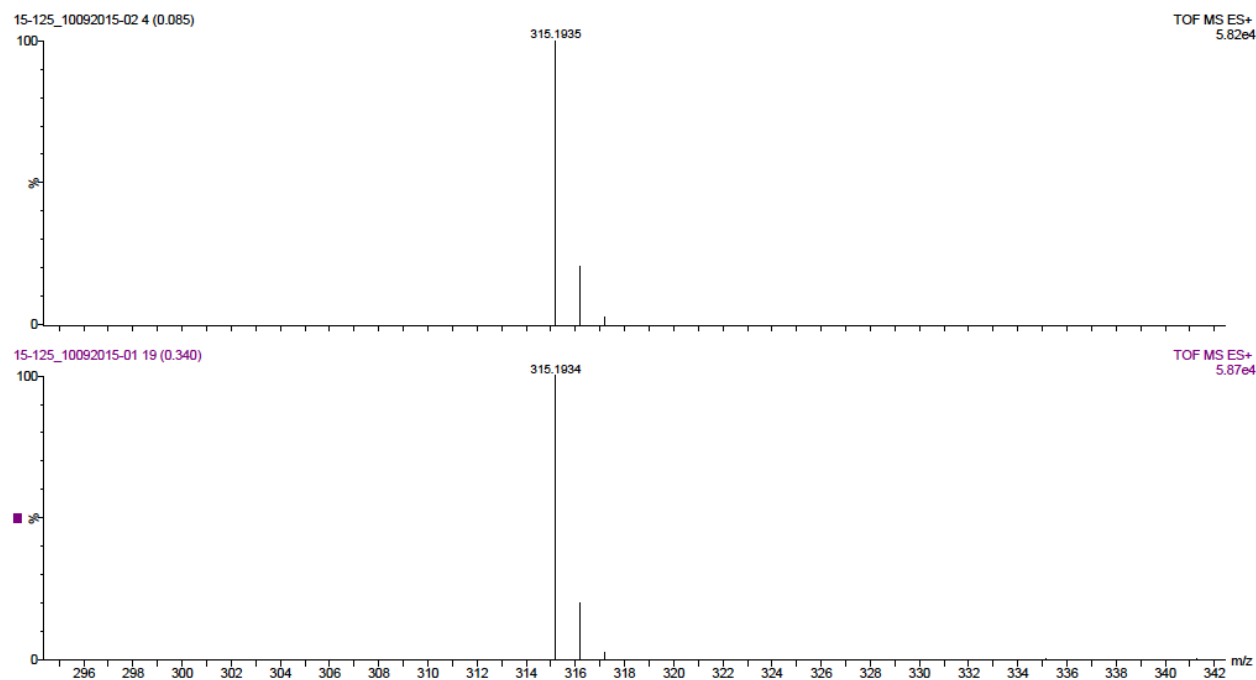

Accurate Mass Data

| Observed Mass | Formula [M+Na] <sup>+</sup>                       | Calculated mass | Difference (ppm) | iFiT (norm) |
|---------------|---------------------------------------------------|-----------------|------------------|-------------|
| 315.1934      | C <sub>18</sub> H <sub>28</sub> O <sub>3</sub> Na | 315.1936        | -0.6             | 1.0         |
| 315.1935      | C <sub>18</sub> H <sub>28</sub> O <sub>3</sub> Na | 315.1936        | -0.3             | 0.6         |

$^1\text{H}$ ,  $^{13}\text{C}$ , COSY, HSQC NMR and HRMS (ESI) data for compound **1b**

$^1\text{H}$  NMR data

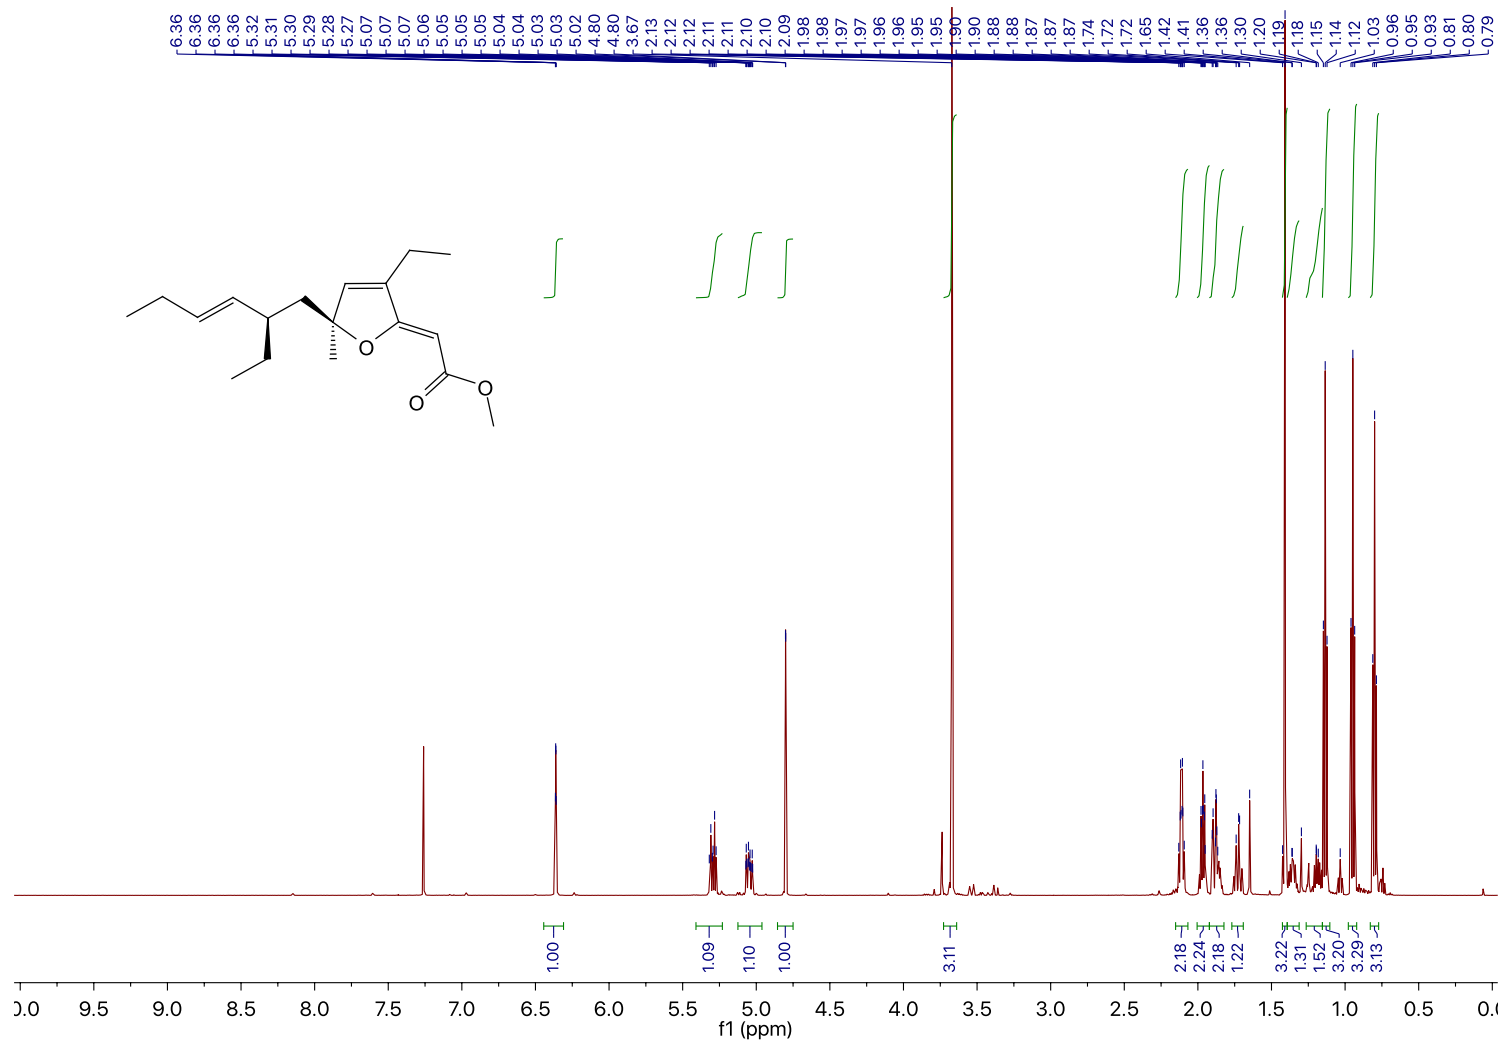

$^{13}\text{C}$  NMR data

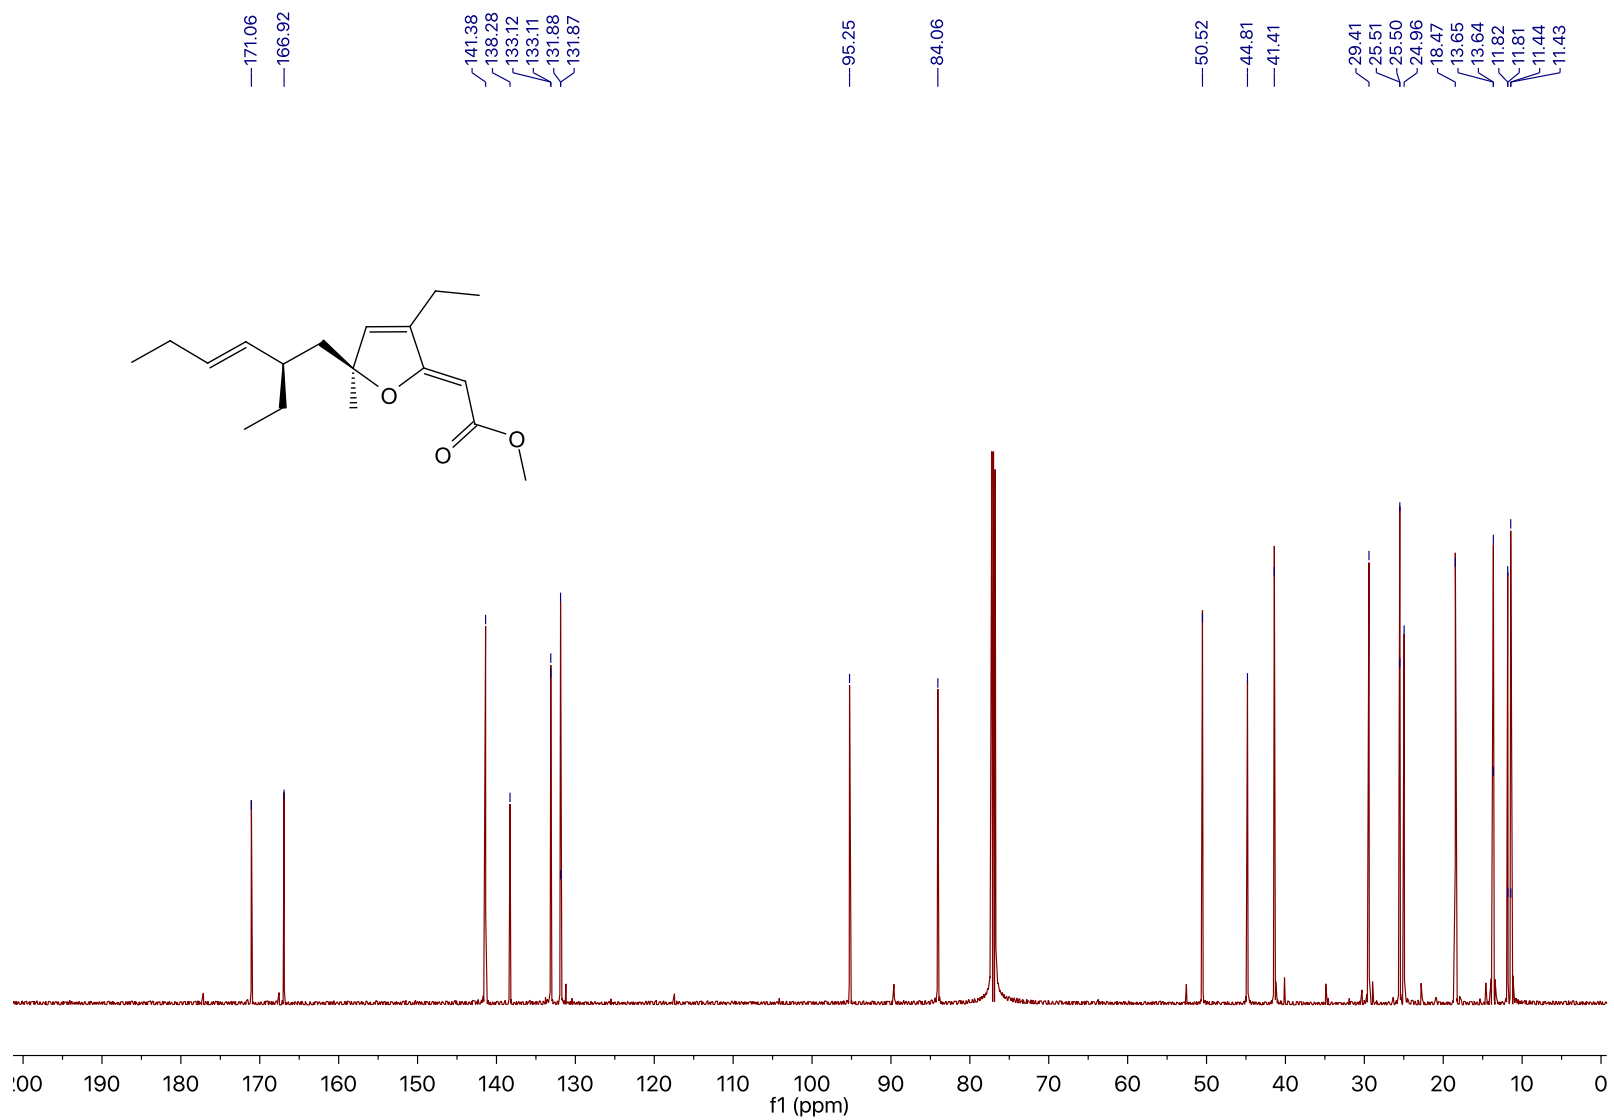

2D NMR Data **1b**  
COSY

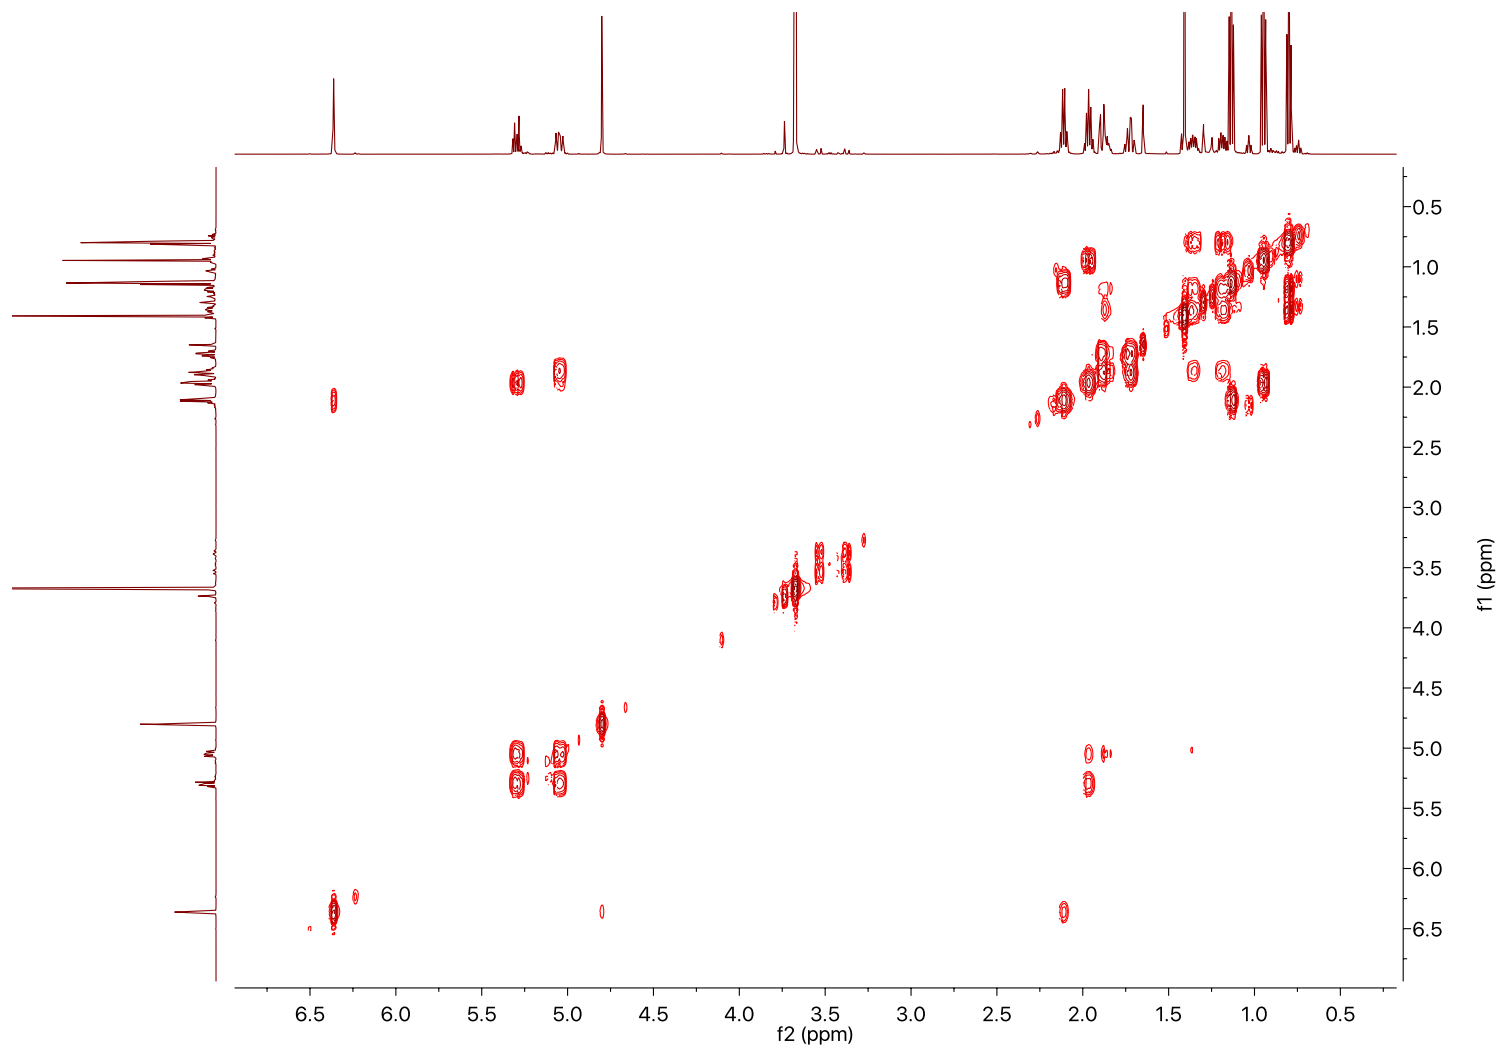

HSQC

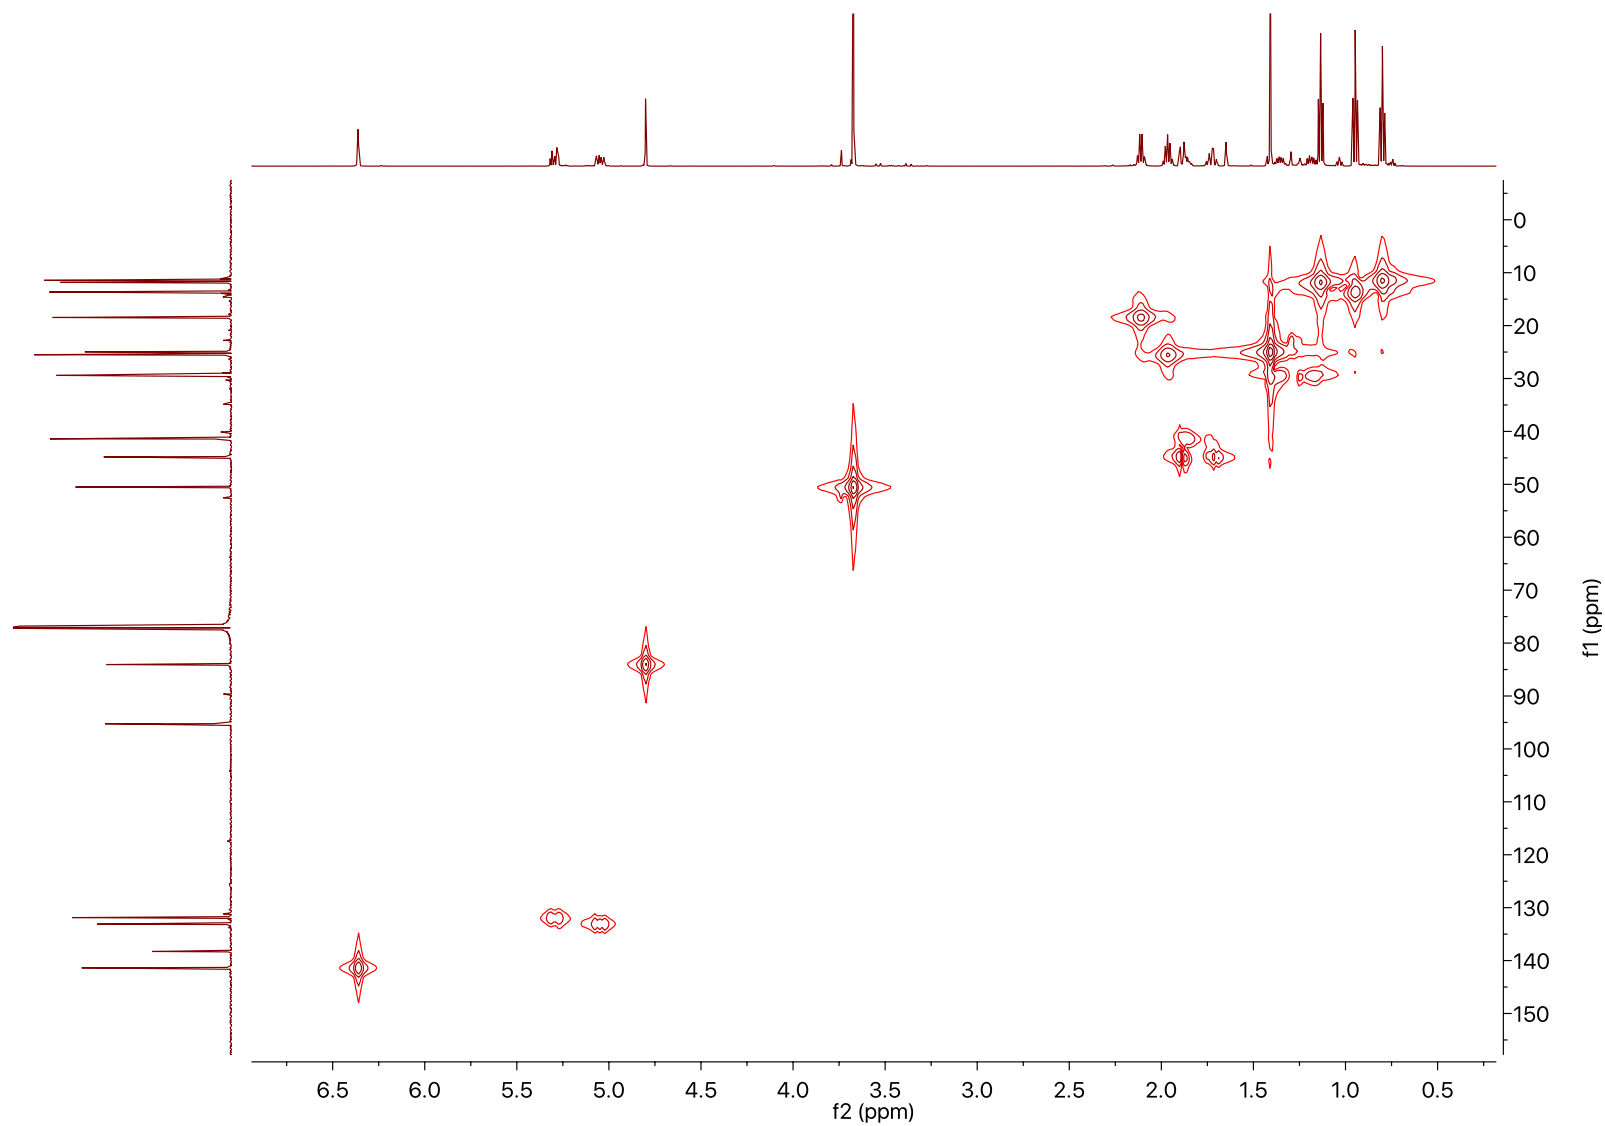

HRMS data

High Resolution Spectra  
Positive ion

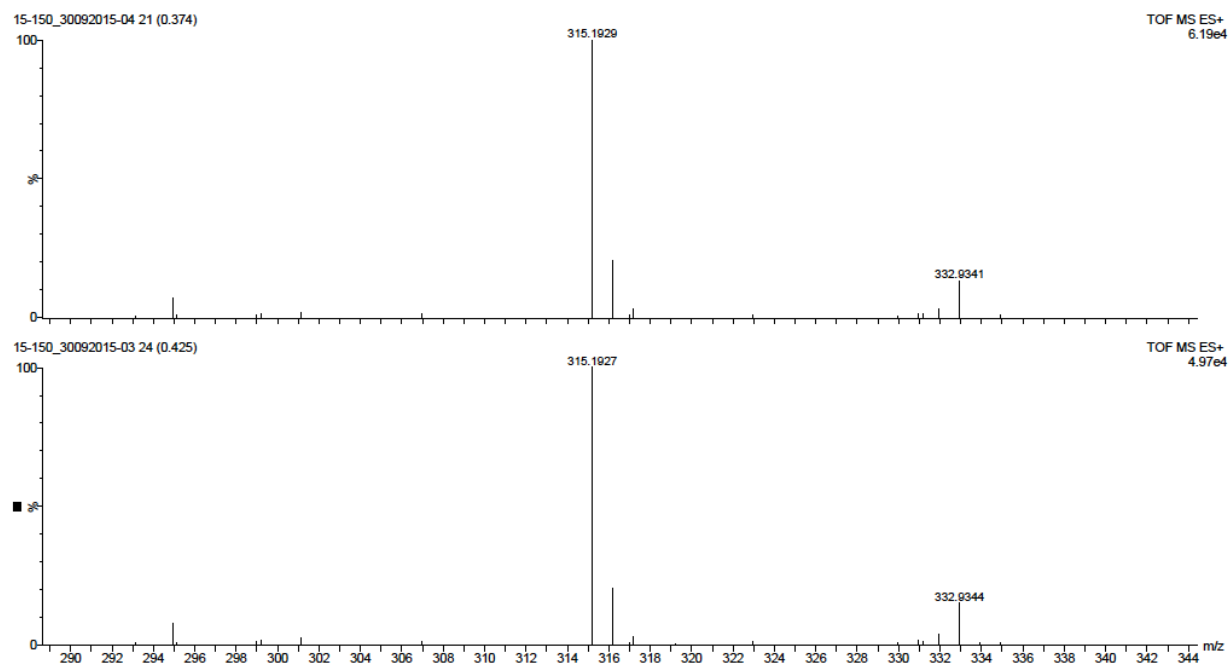

Accurate Mass Data

| Observed Mass | Formula [M+Na] <sup>+</sup>                       | Calculated mass | Difference (ppm) | iFit (norm) |
|---------------|---------------------------------------------------|-----------------|------------------|-------------|
| 315.1927      | C <sub>18</sub> H <sub>28</sub> O <sub>3</sub> Na | 315.1936        | -2.9             | 0.0         |
| 315.1929      | C <sub>18</sub> H <sub>28</sub> O <sub>3</sub> Na | 315.1936        | -2.2             | 0.0         |
